# Supplementary material for: Halogen Bond to Experimentally Significant N-Heterocyclic Carbenes (I, IMe2, IiPr2, ItBu2, IPh2, IMes2, IDipp2, IAd2; I = Imidazol-2-ylidene)
Source: MDPI journal article supplement (doi:10.3390/ijms24109057), 2023-05-21
Supplement: s1 [file s1]

# **Halogen Bond to Experimentally Significant N-Heterocyclic Carbenes (I, IMe<sub>2</sub>, Ii Pr<sub>2</sub>, It Bu<sub>2</sub>, IPh<sub>2</sub>, IMes<sub>2</sub>, IDipp<sub>2</sub>, IAd<sub>2</sub>; I = imidazol-2-ylidene)**

Mirosław Jabłoński

Faculty of Chemistry, Nicolaus Copernicus University in Torun, Gagarina 7, 87-100 Torun, Poland;  
teojab@chem.umk.pl; Tel.: +48-056-611-4695

**SUPPORTING INFORMATION**

**I-CICN**

|    |           |           |           |
|----|-----------|-----------|-----------|
| 7  | -0.000000 | 1.048352  | -1.974041 |
| 6  | 0.000000  | -0.000000 | -1.109247 |
| 7  | -0.000000 | -1.048352 | -1.974041 |
| 6  | 0.000000  | -0.675122 | -3.309507 |
| 6  | 0.000000  | 0.675122  | -3.309507 |
| 1  | -0.000000 | 1.379042  | -4.123234 |
| 1  | -0.000000 | -1.379042 | -4.123234 |
| 1  | -0.000000 | 2.002009  | -1.651508 |
| 1  | -0.000000 | -2.002009 | -1.651508 |
| 6  | 0.000000  | 0.000000  | 3.516444  |
| 17 | 0.000000  | 0.000000  | 1.869788  |
| 7  | 0.000000  | 0.000000  | 4.667221  |

**I-BrCN**

|    |           |           |           |
|----|-----------|-----------|-----------|
| 7  | -0.000000 | 1.049418  | -2.340484 |
| 6  | -0.000000 | -0.000000 | -1.480481 |
| 7  | -0.000000 | -1.049418 | -2.340484 |
| 6  | -0.000000 | -0.675206 | -3.675266 |
| 6  | 0.000000  | 0.675206  | -3.675266 |
| 1  | -0.000000 | 1.379458  | -4.488632 |
| 1  | -0.000000 | -1.379458 | -4.488632 |
| 1  | -0.000000 | 2.002960  | -2.016495 |
| 1  | -0.000000 | -2.002960 | -2.016495 |
| 6  | 0.000000  | 0.000000  | 3.216303  |
| 35 | 0.000000  | 0.000000  | 1.396861  |
| 7  | 0.000000  | 0.000000  | 4.367879  |

**I-ICN**

|    |           |           |           |
|----|-----------|-----------|-----------|
| 7  | 0.000000  | 1.052577  | -2.459037 |
| 6  | 0.000000  | -0.000000 | -1.612315 |
| 7  | -0.000000 | -1.052577 | -2.459037 |
| 6  | 0.000000  | -0.675446 | -3.792286 |
| 6  | 0.000000  | 0.675446  | -3.792286 |
| 1  | 0.000000  | 1.380033  | -4.605177 |
| 1  | -0.000000 | -1.380033 | -4.605177 |
| 1  | 0.000000  | 2.005517  | -2.130054 |
| 1  | -0.000000 | -2.005517 | -2.130054 |
| 6  | 0.000000  | 0.000000  | 3.118025  |
| 53 | 0.000000  | 0.000000  | 1.027730  |
| 7  | 0.000000  | 0.000000  | 4.271495  |

### I-CICCH

|    |           |           |          |
|----|-----------|-----------|----------|
| 7  | 1.289716  | 0.946202  | 0.000000 |
| 6  | 0.000000  | 1.378414  | 0.000000 |
| 7  | 0.182607  | 2.725843  | 0.000000 |
| 6  | 1.514020  | 3.114742  | 0.000000 |
| 6  | 2.227139  | 1.967895  | 0.000000 |
| 1  | 3.290010  | 1.800284  | 0.000000 |
| 1  | 1.833674  | 4.142215  | 0.000000 |
| 1  | 1.515908  | -0.035723 | 0.000000 |
| 1  | -0.595680 | 3.363921  | 0.000000 |
| 6  | -1.381557 | -3.071140 | 0.000000 |
| 6  | -1.546981 | -4.258458 | 0.000000 |
| 1  | -1.698088 | -5.310702 | 0.000000 |
| 17 | -1.148694 | -1.438413 | 0.000000 |

### I-BrCCH

|    |           |           |           |
|----|-----------|-----------|-----------|
| 7  | 1.173341  | -2.508691 | -0.000000 |
| 6  | 0.188071  | -1.573263 | -0.000000 |
| 7  | -0.918776 | -2.361514 | -0.000000 |
| 6  | -0.640150 | -3.719726 | -0.000000 |
| 6  | 0.706935  | -3.814573 | -0.000000 |
| 1  | 1.351816  | -4.675845 | -0.000000 |
| 1  | -1.399272 | -4.482232 | -0.000000 |
| 1  | 2.146700  | -2.251762 | -0.000000 |
| 1  | -1.846516 | -1.970024 | -0.000000 |
| 6  | -0.195678 | 3.242860  | 0.000000  |
| 6  | -0.325155 | 4.436842  | 0.000000  |
| 1  | -0.438825 | 5.494159  | 0.000000  |
| 35 | 0.000000  | 1.444123  | 0.000000  |

### I-ICCH

|    |           |           |           |
|----|-----------|-----------|-----------|
| 7  | -0.980092 | -2.606860 | -0.000000 |
| 6  | 0.096649  | -1.783143 | 0.000000  |
| 7  | 1.118868  | -2.673625 | 0.000000  |
| 6  | 0.701783  | -3.995570 | 0.000000  |
| 6  | -0.648192 | -3.952600 | -0.000000 |
| 1  | -1.377788 | -4.743297 | -0.000000 |
| 1  | 1.379680  | -4.831017 | 0.000000  |
| 1  | -1.922055 | -2.249609 | -0.000000 |
| 1  | 2.081629  | -2.377759 | 0.000000  |
| 6  | -0.114671 | 3.143326  | -0.000000 |
| 6  | -0.183680 | 4.345932  | -0.000000 |
| 1  | -0.244232 | 5.408347  | -0.000000 |
| 53 | -0.000000 | 1.117152  | 0.000000  |

### IMe2-ClCN

|    |           |           |           |
|----|-----------|-----------|-----------|
| 7  | -0.000000 | 1.059672  | -1.675951 |
| 6  | 0.000000  | 0.000000  | -0.823777 |
| 7  | -0.000000 | -1.059672 | -1.675951 |
| 6  | 0.000000  | -0.676056 | -3.005746 |
| 6  | 0.000000  | 0.676056  | -3.005746 |
| 1  | -0.000000 | 1.381466  | -3.819986 |
| 1  | -0.000000 | -1.381466 | -3.819986 |
| 6  | 0.000000  | -0.000000 | 3.784306  |
| 6  | -0.000000 | 2.442160  | -1.231631 |
| 1  | 0.890766  | 2.958590  | -1.592874 |
| 1  | -0.890766 | 2.958590  | -1.592874 |
| 1  | -0.000000 | 2.439116  | -0.144201 |
| 6  | -0.000000 | -2.442160 | -1.231631 |
| 1  | -0.890766 | -2.958590 | -1.592874 |
| 1  | 0.890766  | -2.958590 | -1.592874 |
| 1  | -0.000000 | -2.439116 | -0.144201 |
| 17 | 0.000000  | -0.000000 | 2.135441  |
| 7  | 0.000000  | -0.000000 | 4.935148  |

### IMe2-BrCN

|    |           |           |           |
|----|-----------|-----------|-----------|
| 7  | 0.000000  | 1.060929  | -2.024776 |
| 6  | -0.000000 | 0.000000  | -1.177832 |
| 7  | -0.000000 | -1.060929 | -2.024776 |
| 6  | -0.000000 | -0.676117 | -3.353873 |
| 6  | 0.000000  | 0.676117  | -3.353873 |
| 1  | 0.000000  | 1.381896  | -4.167668 |
| 1  | -0.000000 | -1.381896 | -4.167668 |
| 6  | 0.000000  | -0.000000 | 3.490927  |
| 6  | 0.000000  | 2.444299  | -1.579997 |
| 1  | 0.890935  | 2.959111  | -1.942356 |
| 1  | -0.890935 | 2.959111  | -1.942356 |
| 1  | 0.000000  | 2.444276  | -0.492560 |
| 6  | -0.000000 | -2.444299 | -1.579997 |
| 1  | -0.890935 | -2.959111 | -1.942356 |
| 1  | 0.890935  | -2.959111 | -1.942356 |
| 1  | -0.000000 | -2.444276 | -0.492560 |
| 35 | 0.000000  | -0.000000 | 1.664757  |
| 7  | 0.000000  | -0.000000 | 4.642591  |

### IMe2-ICN

|   |           |           |           |
|---|-----------|-----------|-----------|
| 7 | 0.000000  | 1.064955  | -2.160280 |
| 6 | 0.000000  | 0.000000  | -1.326581 |
| 7 | -0.000000 | -1.064955 | -2.160280 |
| 6 | -0.000000 | -0.676179 | -3.487321 |
| 6 | 0.000000  | 0.676179  | -3.487321 |
| 1 | 0.000000  | 1.382917  | -4.300031 |
| 1 | -0.000000 | -1.382917 | -4.300031 |
| 6 | -0.000000 | -0.000000 | 3.376611  |
| 6 | 0.000000  | 2.452783  | -1.719795 |
| 1 | 0.891514  | 2.961127  | -2.087936 |

|    |           |           |           |
|----|-----------|-----------|-----------|
| 1  | -0.891514 | 2.961127  | -2.087936 |
| 1  | 0.000000  | 2.465040  | -0.632555 |
| 6  | -0.000000 | -2.452783 | -1.719795 |
| 1  | -0.891514 | -2.961127 | -2.087936 |
| 1  | 0.891514  | -2.961127 | -2.087936 |
| 1  | -0.000000 | -2.465040 | -0.632555 |
| 53 | -0.000000 | -0.000000 | 1.262876  |
| 7  | -0.000000 | -0.000000 | 4.530515  |

### IMe2-ClCCH

|    |           |           |           |
|----|-----------|-----------|-----------|
| 7  | -1.059077 | 1.732623  | 0.000000  |
| 6  | 0.000000  | 0.878339  | 0.000000  |
| 7  | 1.059306  | 1.732384  | -0.000000 |
| 6  | 0.676421  | 3.062607  | -0.000000 |
| 6  | -0.675893 | 3.062776  | 0.000000  |
| 1  | -1.380865 | 3.877489  | 0.000000  |
| 1  | 1.381562  | 3.877174  | -0.000000 |
| 6  | -0.000224 | -3.833929 | -0.000000 |
| 6  | -0.000236 | -5.033164 | -0.000000 |
| 1  | -0.000227 | -6.096092 | -0.000000 |
| 6  | -2.439931 | 1.284725  | 0.000000  |
| 1  | -2.958076 | 1.644109  | 0.890771  |
| 1  | -2.958076 | 1.644109  | -0.890771 |
| 1  | -2.430875 | 0.197173  | 0.000000  |
| 6  | 2.440038  | 1.284095  | -0.000000 |
| 1  | 2.958285  | 1.643333  | -0.890770 |
| 1  | 2.958285  | 1.643333  | 0.890770  |
| 1  | 2.430657  | 0.196545  | -0.000000 |
| 17 | -0.000195 | -2.183230 | -0.000000 |

### IMe2-BrCCH

|    |           |           |           |
|----|-----------|-----------|-----------|
| 7  | -0.000000 | 1.059856  | -2.117456 |
| 6  | 0.000000  | -0.000000 | -1.266152 |
| 7  | -0.000000 | -1.059856 | -2.117456 |
| 6  | 0.000000  | -0.676033 | -3.447409 |
| 6  | 0.000000  | 0.676033  | -3.447409 |
| 1  | -0.000000 | 1.381588  | -4.261514 |
| 1  | 0.000000  | -1.381588 | -4.261514 |
| 6  | -0.000000 | 0.000000  | 3.550025  |
| 6  | -0.000000 | 0.000000  | 4.751109  |
| 1  | -0.000000 | 0.000000  | 5.814562  |
| 6  | -0.000000 | 2.441242  | -1.669290 |
| 1  | 0.890744  | 2.958585  | -2.029342 |
| 1  | -0.890745 | 2.958585  | -2.029341 |
| 1  | 0.000000  | 2.434287  | -0.581789 |
| 6  | 0.000000  | -2.441242 | -1.669290 |
| 1  | -0.890744 | -2.958585 | -2.029342 |
| 1  | 0.890745  | -2.958585 | -2.029341 |
| 1  | -0.000000 | -2.434287 | -0.581789 |
| 35 | -0.000000 | 0.000000  | 1.737837  |

## IMe2-ICCH

|    |           |           |           |
|----|-----------|-----------|-----------|
| 7  | -0.000000 | 1.061666  | -2.323298 |
| 6  | 0.000000  | 0.000000  | -1.478641 |
| 7  | -0.000000 | -1.061666 | -2.323298 |
| 6  | 0.000000  | -0.676184 | -3.651987 |
| 6  | -0.000000 | 0.676184  | -3.651987 |
| 1  | -0.000000 | 1.382113  | -4.465627 |
| 1  | 0.000000  | -1.382113 | -4.465627 |
| 6  | 0.000000  | -0.000000 | 3.420650  |
| 6  | 0.000000  | -0.000000 | 4.625594  |
| 1  | 0.000000  | -0.000000 | 5.689800  |
| 6  | -0.000000 | 2.445518  | -1.878018 |
| 1  | 0.891132  | 2.959301  | -2.241146 |
| 1  | -0.891133 | 2.959300  | -2.241146 |
| 1  | 0.000000  | 2.446502  | -0.790357 |
| 6  | 0.000000  | -2.445518 | -1.878018 |
| 1  | -0.891132 | -2.959301 | -2.241146 |
| 1  | 0.891133  | -2.959300 | -2.241146 |
| 1  | -0.000000 | -2.446502 | -0.790357 |
| 53 | 0.000000  | -0.000000 | 1.382403  |

## liPr2-ClCN

|    |           |           |           |
|----|-----------|-----------|-----------|
| 7  | 0.000000  | 1.061799  | -1.191634 |
| 6  | 0.000000  | 0.000000  | -0.342493 |
| 7  | -0.000000 | -1.061799 | -1.191634 |
| 6  | 0.000000  | -0.676473 | -2.521293 |
| 6  | 0.000000  | 0.676473  | -2.521293 |
| 1  | 0.000000  | 1.374080  | -3.342091 |
| 1  | -0.000000 | -1.374080 | -3.342091 |
| 6  | -0.000000 | 0.000000  | 4.261810  |
| 17 | -0.000000 | 0.000000  | 2.612354  |
| 6  | 0.000000  | -2.452892 | -0.731143 |
| 6  | 1.266753  | -3.169767 | -1.187697 |
| 6  | -1.266753 | -3.169767 | -1.187697 |
| 1  | 0.000000  | -2.374442 | 0.357233  |
| 1  | 2.154444  | -2.630499 | -0.853800 |
| 1  | 1.294452  | -4.180253 | -0.775542 |
| 1  | 1.299285  | -3.250401 | -2.277631 |
| 1  | -2.154444 | -2.630499 | -0.853800 |
| 1  | -1.299285 | -3.250401 | -2.277631 |
| 1  | -1.294452 | -4.180253 | -0.775542 |
| 6  | 0.000000  | 2.452892  | -0.731143 |
| 6  | -1.266753 | 3.169767  | -1.187697 |
| 6  | 1.266753  | 3.169767  | -1.187697 |
| 1  | 0.000000  | 2.374442  | 0.357233  |
| 1  | -2.154444 | 2.630499  | -0.853800 |
| 1  | -1.294452 | 4.180253  | -0.775542 |
| 1  | -1.299285 | 3.250401  | -2.277631 |
| 1  | 2.154444  | 2.630499  | -0.853800 |
| 1  | 1.299285  | 3.250401  | -2.277631 |
| 1  | 1.294452  | 4.180253  | -0.775542 |
| 7  | -0.000000 | 0.000000  | 5.412646  |

**LiPr2-BrCN**

|    |           |           |           |
|----|-----------|-----------|-----------|
| 7  | 0.000000  | 1.063125  | -1.517288 |
| 6  | 0.000000  | 0.000000  | -0.673611 |
| 7  | -0.000000 | -1.063125 | -1.517288 |
| 6  | 0.000000  | -0.676527 | -2.846194 |
| 6  | 0.000000  | 0.676527  | -2.846194 |
| 1  | 0.000000  | 1.374576  | -3.666455 |
| 1  | -0.000000 | -1.374576 | -3.666455 |
| 6  | -0.000000 | 0.000000  | 3.983971  |
| 35 | -0.000000 | 0.000000  | 2.155242  |
| 6  | 0.000000  | 2.455656  | -1.056714 |
| 6  | -1.267201 | 3.170435  | -1.514570 |
| 6  | 1.267201  | 3.170435  | -1.514570 |
| 1  | -0.000000 | 2.380169  | 0.031817  |
| 1  | -2.154859 | 2.631543  | -1.180036 |
| 1  | -1.295146 | 4.180961  | -1.102891 |
| 1  | -1.299405 | 3.250436  | -2.604521 |
| 1  | 2.154859  | 2.631543  | -1.180036 |
| 1  | 1.299405  | 3.250436  | -2.604521 |
| 1  | 1.295146  | 4.180961  | -1.102891 |
| 6  | -0.000000 | -2.455656 | -1.056714 |
| 6  | 1.267201  | -3.170435 | -1.514570 |
| 6  | -1.267201 | -3.170435 | -1.514570 |
| 1  | -0.000000 | -2.380169 | 0.031817  |
| 1  | 2.154859  | -2.631543 | -1.180036 |
| 1  | 1.295146  | -4.180961 | -1.102891 |
| 1  | 1.299405  | -3.250436 | -2.604521 |
| 1  | -2.154859 | -2.631543 | -1.180036 |
| 1  | -1.299405 | -3.250436 | -2.604521 |
| 1  | -1.295146 | -4.180961 | -1.102891 |
| 7  | -0.000000 | 0.000000  | 5.135722  |

**LiPr2-ICN**

|   |           |           |           |
|---|-----------|-----------|-----------|
| 7 | 1.696338  | 1.067897  | 0.081567  |
| 6 | 0.874410  | -0.000107 | 0.179499  |
| 7 | 1.695770  | -1.068567 | 0.081703  |
| 6 | 3.010014  | -0.677743 | -0.097150 |
| 6 | 3.010372  | 0.676354  | -0.097250 |
| 1 | 3.825059  | 1.372973  | -0.194367 |
| 1 | 3.824336  | -1.374801 | -0.194158 |
| 6 | -3.802798 | 0.000665  | 0.008110  |
| 6 | 1.214757  | 2.459319  | 0.078022  |
| 6 | 1.070342  | 2.953634  | -1.357233 |
| 6 | 2.123514  | 3.350121  | 0.915756  |
| 1 | 0.229624  | 2.412335  | 0.544487  |
| 1 | 0.390327  | 2.308261  | -1.915787 |
| 1 | 0.671725  | 3.969748  | -1.365666 |
| 1 | 2.041315  | 2.960066  | -1.860035 |
| 1 | 2.263379  | 2.938594  | 1.916551  |
| 1 | 3.102439  | 3.477436  | 0.446787  |
| 1 | 1.673277  | 4.339548  | 1.007584  |
| 6 | 1.213404  | -2.459723 | 0.078231  |
| 6 | 2.122215  | -3.351206 | 0.915180  |

|    |           |           |           |
|----|-----------|-----------|-----------|
| 6  | 1.067752  | -2.953692 | -1.357019 |
| 1  | 0.228611  | -2.412285 | 0.545367  |
| 1  | 2.263115  | -2.939895 | 1.915919  |
| 1  | 1.671385  | -4.340340 | 1.007236  |
| 1  | 3.100693  | -3.479134 | 0.445447  |
| 1  | 0.387692  | -2.307860 | -1.914987 |
| 1  | 2.038386  | -2.960527 | -1.860470 |
| 1  | 0.668597  | -3.969597 | -1.365373 |
| 7  | -4.955092 | 0.000840  | -0.058071 |
| 53 | -1.676660 | 0.000350  | 0.122796  |

### LiPr2-ClCCH

|    |           |           |           |
|----|-----------|-----------|-----------|
| 7  | 0.000000  | 1.060914  | -1.234423 |
| 6  | -0.000000 | 0.000000  | -0.383123 |
| 7  | -0.000000 | -1.060914 | -1.234423 |
| 6  | -0.000000 | -0.676762 | -2.564753 |
| 6  | 0.000000  | 0.676762  | -2.564753 |
| 1  | 0.000000  | 1.374279  | -3.385801 |
| 1  | -0.000000 | -1.374279 | -3.385801 |
| 6  | 0.000000  | 0.000000  | 4.327410  |
| 6  | 0.000000  | 0.000000  | 5.526704  |
| 1  | 0.000000  | 0.000000  | 6.589629  |
| 17 | 0.000000  | 0.000000  | 2.676532  |
| 6  | -0.000000 | -2.450217 | -0.770623 |
| 6  | 1.266845  | -3.168680 | -1.225200 |
| 6  | -1.266845 | -3.168680 | -1.225200 |
| 1  | -0.000000 | -2.366889 | 0.317517  |
| 1  | 2.153883  | -2.628901 | -0.890361 |
| 1  | 1.293464  | -4.178750 | -0.811707 |
| 1  | 1.300853  | -3.250261 | -2.315138 |
| 1  | -2.153883 | -2.628901 | -0.890361 |
| 1  | -1.300853 | -3.250261 | -2.315138 |
| 1  | -1.293464 | -4.178750 | -0.811707 |
| 6  | 0.000000  | 2.450217  | -0.770623 |
| 6  | -1.266845 | 3.168680  | -1.225200 |
| 6  | 1.266845  | 3.168680  | -1.225200 |
| 1  | 0.000000  | 2.366889  | 0.317517  |
| 1  | -2.153883 | 2.628901  | -0.890361 |
| 1  | -1.293464 | 4.178750  | -0.811707 |
| 1  | -1.300853 | 3.250261  | -2.315138 |
| 1  | 2.153883  | 2.628901  | -0.890361 |
| 1  | 1.300853  | 3.250261  | -2.315138 |
| 1  | 1.293464  | 4.178750  | -0.811707 |

### LiPr2-BrCCH

|   |           |           |           |
|---|-----------|-----------|-----------|
| 7 | 0.000000  | 1.061975  | -1.590764 |
| 6 | 0.000000  | -0.000000 | -0.742648 |
| 7 | -0.000000 | -1.061975 | -1.590764 |
| 6 | -0.000000 | -0.676564 | -2.920461 |
| 6 | 0.000000  | 0.676564  | -2.920461 |
| 1 | 0.000000  | 1.374188  | -3.741261 |
| 1 | -0.000000 | -1.374188 | -3.741261 |



|    |           |           |           |
|----|-----------|-----------|-----------|
| 6  | -0.000000 | 0.000000  | 4.066550  |
| 6  | -0.000000 | 0.000000  | 5.267744  |
| 1  | -0.000000 | 0.000000  | 6.331202  |
| 35 | -0.000000 | 0.000000  | 2.253382  |
| 6  | 0.000000  | 2.452143  | -1.127212 |
| 6  | -1.266960 | 3.169392  | -1.582725 |
| 6  | 1.266960  | 3.169392  | -1.582725 |
| 1  | 0.000000  | 2.371176  | -0.038967 |
| 1  | -2.154042 | 2.629449  | -1.248319 |
| 1  | -1.294570 | 4.179351  | -1.169216 |
| 1  | -1.300125 | 3.251007  | -2.672665 |
| 1  | 2.154042  | 2.629449  | -1.248319 |
| 1  | 1.300125  | 3.251007  | -2.672665 |
| 1  | 1.294570  | 4.179351  | -1.169216 |
| 6  | -0.000000 | -2.452143 | -1.127212 |
| 6  | 1.266960  | -3.169392 | -1.582725 |
| 6  | -1.266960 | -3.169392 | -1.582725 |
| 1  | -0.000000 | -2.371176 | -0.038967 |
| 1  | 2.154042  | -2.629449 | -1.248319 |
| 1  | 1.294570  | -4.179351 | -1.169216 |
| 1  | 1.300125  | -3.251007 | -2.672665 |
| 1  | -2.154042 | -2.629449 | -1.248319 |
| 1  | -1.300125 | -3.251007 | -2.672665 |
| 1  | -1.294570 | -4.179351 | -1.169216 |

## liPr2-ICCH

|    |           |           |           |
|----|-----------|-----------|-----------|
| 7  | 1.812864  | 1.063948  | -0.052095 |
| 6  | 0.984749  | -0.000013 | -0.195970 |
| 7  | 1.812283  | -1.064393 | -0.051753 |
| 6  | 3.118182  | -0.677333 | 0.192237  |
| 6  | 3.118554  | 0.676259  | 0.192046  |
| 1  | 3.926605  | 1.373512  | 0.335255  |
| 1  | 3.925865  | -1.374995 | 0.335557  |
| 6  | -3.879351 | 0.000436  | 0.033550  |
| 6  | -5.081537 | 0.000527  | 0.119004  |
| 1  | -6.143136 | 0.000606  | 0.193741  |
| 53 | -1.840823 | 0.000277  | -0.109285 |
| 6  | 1.341601  | 2.453747  | -0.087214 |
| 6  | 2.181525  | 3.286653  | -1.048902 |
| 6  | 1.318038  | 3.035911  | 1.322345  |
| 1  | 0.320511  | 2.384574  | -0.465867 |
| 1  | 2.210562  | 2.826096  | -2.037553 |
| 1  | 1.751620  | 4.285396  | -1.141908 |
| 1  | 3.206517  | 3.399588  | -0.685980 |
| 1  | 0.692024  | 2.424727  | 1.974535  |
| 1  | 2.327310  | 3.073716  | 1.741764  |
| 1  | 0.917526  | 4.051324  | 1.303962  |
| 6  | 1.340421  | -2.453979 | -0.086932 |
| 6  | 1.317782  | -3.036628 | 1.322437  |
| 6  | 2.179252  | -3.286882 | -1.049587 |
| 1  | 0.319059  | -2.384277 | -0.464740 |
| 1  | 0.692551  | -2.425441 | 1.975375  |
| 1  | 0.916853  | -4.051874 | 1.304015  |
| 1  | 2.327372  | -3.075010 | 1.741040  |

|   |          |           |           |
|---|----------|-----------|-----------|
| 1 | 2.207616 | -2.826012 | -2.038109 |
| 1 | 3.204513 | -3.400243 | -0.687553 |
| 1 | 1.748938 | -4.285454 | -1.142545 |

# ItBu2-ClCN

|    |           |           |           |
|----|-----------|-----------|-----------|
| 7  | -0.000000 | 1.065163  | -1.285219 |
| 6  | 0.000000  | 0.000000  | -0.431785 |
| 7  | -0.000000 | -1.065163 | -1.285219 |
| 6  | 0.000000  | -0.674066 | -2.614804 |
| 6  | 0.000000  | 0.674066  | -2.614804 |
| 1  | -0.000000 | 1.365196  | -3.440058 |
| 1  | -0.000000 | -1.365196 | -3.440058 |
| 6  | -0.000000 | -0.000000 | 4.356394  |
| 17 | -0.000000 | -0.000000 | 2.712509  |
| 6  | 0.000000  | -2.495908 | -0.898550 |
| 6  | -1.259993 | -3.154447 | -1.469498 |
| 6  | 1.259993  | -3.154447 | -1.469498 |
| 6  | 0.000000  | -2.626256 | 0.618514  |
| 1  | -2.152054 | -2.657295 | -1.082915 |
| 1  | -1.282419 | -3.105981 | -2.560274 |
| 1  | -1.292011 | -4.206579 | -1.178431 |
| 1  | 2.152054  | -2.657295 | -1.082915 |
| 1  | 1.292011  | -4.206579 | -1.178431 |
| 1  | 1.282419  | -3.105981 | -2.560274 |
| 1  | 0.000000  | -3.687683 | 0.876313  |
| 1  | 0.883905  | -2.157113 | 1.050792  |
| 1  | -0.883905 | -2.157113 | 1.050792  |
| 6  | 0.000000  | 2.495908  | -0.898550 |
| 6  | -1.259993 | 3.154447  | -1.469498 |
| 6  | 0.000000  | 2.626256  | 0.618514  |
| 6  | 1.259993  | 3.154447  | -1.469498 |
| 1  | -1.282419 | 3.105981  | -2.560274 |
| 1  | -2.152054 | 2.657295  | -1.082915 |
| 1  | -1.292011 | 4.206579  | -1.178431 |
| 1  | 0.883905  | 2.157113  | 1.050792  |
| 1  | 0.000000  | 3.687683  | 0.876313  |
| 1  | -0.883905 | 2.157113  | 1.050792  |
| 1  | 1.292011  | 4.206579  | -1.178431 |
| 1  | 2.152054  | 2.657295  | -1.082915 |
| 1  | 1.282419  | 3.105981  | -2.560274 |
| 7  | -0.000000 | -0.000000 | 5.507082  |

# ItBu2-BrCN

|    |           |           |           |
|----|-----------|-----------|-----------|
| 7  | 0.000000  | 1.066310  | -1.619288 |
| 6  | 0.000000  | 0.000000  | -0.765116 |
| 7  | -0.000000 | -1.066310 | -1.619288 |
| 6  | 0.000000  | -0.673510 | -2.947842 |
| 6  | 0.000000  | 0.673510  | -2.947842 |
| 1  | 0.000000  | 1.364298  | -3.773061 |
| 1  | -0.000000 | -1.364298 | -3.773061 |
| 6  | -0.000000 | -0.000000 | 4.189830  |
| 35 | -0.000000 | -0.000000 | 2.383177  |

|   |           |           |           |
|---|-----------|-----------|-----------|
| 6 | 0.000000  | 2.503788  | -1.252109 |
| 6 | 1.260378  | 3.153239  | -1.833117 |
| 6 | -1.260378 | 3.153239  | -1.833117 |
| 6 | 0.000000  | 2.662503  | 0.260669  |
| 1 | 2.152359  | 2.660767  | -1.440438 |
| 1 | 1.282844  | 3.091768  | -2.923084 |
| 1 | 1.292960  | 4.208783  | -1.555011 |
| 1 | -2.152359 | 2.660767  | -1.440438 |
| 1 | -1.292960 | 4.208783  | -1.555011 |
| 1 | -1.282844 | 3.091768  | -2.923084 |
| 1 | 0.000000  | 3.728458  | 0.498456  |
| 1 | -0.884926 | 2.204910  | 0.702766  |
| 1 | 0.884926  | 2.204910  | 0.702766  |
| 6 | -0.000000 | -2.503788 | -1.252109 |
| 6 | 1.260378  | -3.153239 | -1.833117 |
| 6 | -0.000000 | -2.662503 | 0.260669  |
| 6 | -1.260378 | -3.153239 | -1.833117 |
| 1 | 1.282844  | -3.091768 | -2.923084 |
| 1 | 2.152359  | -2.660767 | -1.440438 |
| 1 | 1.292960  | -4.208783 | -1.555011 |
| 1 | -0.884926 | -2.204910 | 0.702766  |
| 1 | -0.000000 | -3.728458 | 0.498456  |
| 1 | 0.884926  | -2.204910 | 0.702766  |
| 1 | -1.292960 | -4.208783 | -1.555011 |
| 1 | -2.152359 | -2.660767 | -1.440438 |
| 1 | -1.282844 | -3.091768 | -2.923084 |
| 7 | -0.000000 | -0.000000 | 5.341288  |

# ItBu2-ICN

|    |           |           |           |
|----|-----------|-----------|-----------|
| 7  | 0.000000  | 1.068164  | -1.884912 |
| 6  | -0.000000 | -0.000000 | -1.029785 |
| 7  | -0.000000 | -1.068164 | -1.884912 |
| 6  | -0.000000 | -0.672683 | -3.211975 |
| 6  | 0.000000  | 0.672683  | -3.211975 |
| 1  | 0.000000  | 1.362672  | -4.037376 |
| 1  | -0.000000 | -1.362672 | -4.037376 |
| 6  | 0.000000  | 0.000000  | 4.156135  |
| 53 | 0.000000  | 0.000000  | 2.132201  |
| 6  | 0.000000  | 2.515742  | -1.546940 |
| 6  | 1.261070  | 3.151079  | -2.142683 |
| 6  | -1.261070 | 3.151079  | -2.142683 |
| 6  | 0.000000  | 2.717889  | -0.041311 |
| 1  | 2.152871  | 2.666392  | -1.740058 |
| 1  | 1.284235  | 3.069361  | -3.231063 |
| 1  | 1.294077  | 4.211645  | -1.884815 |
| 1  | -2.152871 | 2.666392  | -1.740058 |
| 1  | -1.294077 | 4.211645  | -1.884815 |
| 1  | -1.284235 | 3.069361  | -3.231063 |
| 1  | 0.000000  | 3.790350  | 0.164446  |
| 1  | -0.886637 | 2.278420  | 0.415079  |
| 1  | 0.886637  | 2.278420  | 0.415079  |
| 6  | -0.000000 | -2.515742 | -1.546940 |
| 6  | 1.261070  | -3.151079 | -2.142683 |
| 6  | -0.000000 | -2.717889 | -0.041311 |

|   |           |           |           |
|---|-----------|-----------|-----------|
| 6 | -1.261070 | -3.151079 | -2.142683 |
| 1 | 1.284235  | -3.069361 | -3.231063 |
| 1 | 2.152871  | -2.666392 | -1.740058 |
| 1 | 1.294077  | -4.211645 | -1.884815 |
| 1 | -0.886637 | -2.278420 | 0.415079  |
| 1 | -0.000000 | -3.790350 | 0.164446  |
| 1 | 0.886637  | -2.278420 | 0.415079  |
| 1 | -1.294077 | -4.211645 | -1.884815 |
| 1 | -2.152871 | -2.666392 | -1.740058 |
| 1 | -1.284235 | -3.069361 | -3.231063 |
| 7 | 0.000000  | 0.000000  | 5.308626  |

# ItBu2-CICCH

|    |           |           |           |
|----|-----------|-----------|-----------|
| 7  | -0.000000 | 1.064454  | -1.335219 |
| 6  | 0.000000  | 0.000000  | -0.481796 |
| 7  | -0.000000 | -1.064454 | -1.335219 |
| 6  | 0.000000  | -0.674412 | -2.665487 |
| 6  | 0.000000  | 0.674412  | -2.665487 |
| 1  | -0.000000 | 1.365538  | -3.490966 |
| 1  | -0.000000 | -1.365538 | -3.490966 |
| 6  | 0.000000  | 0.000000  | 4.445024  |
| 6  | 0.000000  | 0.000000  | 5.643901  |
| 1  | 0.000000  | 0.000000  | 6.706883  |
| 17 | 0.000000  | 0.000000  | 2.797553  |
| 6  | 0.000000  | -2.491074 | -0.937025 |
| 6  | -1.259665 | -3.154723 | -1.502667 |
| 6  | 1.259665  | -3.154723 | -1.502667 |
| 6  | 0.000000  | -2.604896 | 0.582019  |
| 1  | -2.151450 | -2.654620 | -1.119284 |
| 1  | -1.282213 | -3.113853 | -2.593935 |
| 1  | -1.291530 | -4.204768 | -1.203800 |
| 1  | 2.151450  | -2.654620 | -1.119284 |
| 1  | 1.291530  | -4.204768 | -1.203800 |
| 1  | 1.282213  | -3.113853 | -2.593935 |
| 1  | 0.000000  | -3.663732 | 0.851306  |
| 1  | 0.881434  | -2.127885 | 1.010582  |
| 1  | -0.881434 | -2.127885 | 1.010582  |
| 6  | 0.000000  | 2.491074  | -0.937025 |
| 6  | -1.259665 | 3.154723  | -1.502667 |
| 6  | 0.000000  | 2.604896  | 0.582019  |
| 6  | 1.259665  | 3.154723  | -1.502667 |
| 1  | -1.282213 | 3.113853  | -2.593935 |
| 1  | -2.151450 | 2.654620  | -1.119284 |
| 1  | -1.291530 | 4.204768  | -1.203800 |
| 1  | 0.881434  | 2.127885  | 1.010582  |
| 1  | 0.000000  | 3.663732  | 0.851306  |
| 1  | -0.881434 | 2.127885  | 1.010582  |
| 1  | 1.291530  | 4.204768  | -1.203800 |
| 1  | 2.151450  | 2.654620  | -1.119284 |
| 1  | 1.282213  | 3.113853  | -2.593935 |

**ItBu2-BrCCH**

|    |           |           |           |
|----|-----------|-----------|-----------|
| 7  | 0.000000  | 1.065147  | -1.693941 |
| 6  | 0.000000  | 0.000000  | -0.839647 |
| 7  | -0.000000 | -1.065147 | -1.693941 |
| 6  | -0.000000 | -0.673978 | -3.023521 |
| 6  | 0.000000  | 0.673978  | -3.023521 |
| 1  | 0.000000  | 1.365002  | -3.848847 |
| 1  | -0.000000 | -1.365002 | -3.848847 |
| 6  | -0.000000 | -0.000000 | 4.281831  |
| 6  | -0.000000 | -0.000000 | 5.482308  |
| 1  | -0.000000 | -0.000000 | 6.545768  |
| 35 | -0.000000 | -0.000000 | 2.479539  |
| 6  | 0.000000  | 2.496640  | -1.309930 |
| 6  | 1.259960  | 3.154078  | -1.882576 |
| 6  | -1.259960 | 3.154078  | -1.882576 |
| 6  | 0.000000  | 2.630210  | 0.206352  |
| 1  | 2.151734  | 2.657194  | -1.494991 |
| 1  | 1.282527  | 3.104091  | -2.973344 |
| 1  | 1.292241  | 4.206617  | -1.592796 |
| 1  | -2.151734 | 2.657194  | -1.494991 |
| 1  | -1.292241 | 4.206617  | -1.592796 |
| 1  | -1.282527 | 3.104091  | -2.973344 |
| 1  | 0.000000  | 3.692322  | 0.462020  |
| 1  | -0.882988 | 2.161760  | 0.640944  |
| 1  | 0.882988  | 2.161760  | 0.640944  |
| 6  | -0.000000 | -2.496640 | -1.309930 |
| 6  | 1.259960  | -3.154078 | -1.882576 |
| 6  | -0.000000 | -2.630210 | 0.206352  |
| 6  | -1.259960 | -3.154078 | -1.882576 |
| 1  | 1.282527  | -3.104091 | -2.973344 |
| 1  | 2.151734  | -2.657194 | -1.494991 |
| 1  | 1.292241  | -4.206617 | -1.592796 |
| 1  | -0.882988 | -2.161760 | 0.640944  |
| 1  | -0.000000 | -3.692322 | 0.462020  |
| 1  | 0.882988  | -2.161760 | 0.640944  |
| 1  | -1.292241 | -4.206617 | -1.592796 |
| 1  | -2.151734 | -2.657194 | -1.494991 |
| 1  | -1.282527 | -3.104091 | -2.973344 |

**ItBu2-ICCH**

|    |           |           |           |
|----|-----------|-----------|-----------|
| 7  | -0.000000 | 1.066165  | -1.988967 |
| 6  | 0.000000  | -0.000000 | -1.133291 |
| 7  | -0.000000 | -1.066165 | -1.988967 |
| 6  | 0.000000  | -0.673366 | -3.317556 |
| 6  | 0.000000  | 0.673366  | -3.317556 |
| 1  | -0.000000 | 1.364055  | -4.142838 |
| 1  | -0.000000 | -1.364055 | -4.142838 |
| 6  | 0.000000  | 0.000000  | 4.242461  |
| 6  | 0.000000  | 0.000000  | 5.445740  |
| 1  | 0.000000  | 0.000000  | 6.509835  |
| 53 | 0.000000  | 0.000000  | 2.238526  |
| 6  | -0.000000 | 2.504755  | -1.626065 |
| 6  | 1.260384  | 3.152501  | -2.209295 |

|   |           |           |           |
|---|-----------|-----------|-----------|
| 6 | -1.260384 | 3.152501  | -2.209295 |
| 6 | -0.000000 | 2.668403  | -0.114505 |
| 1 | 2.152073  | 2.660888  | -1.814893 |
| 1 | 1.283158  | 3.088313  | -3.299149 |
| 1 | 1.292993  | 4.208730  | -1.933619 |
| 1 | -2.152073 | 2.660888  | -1.814893 |
| 1 | -1.292993 | 4.208730  | -1.933619 |
| 1 | -1.283158 | 3.088313  | -3.299149 |
| 1 | -0.000000 | 3.735127  | 0.120515  |
| 1 | -0.884150 | 2.211804  | 0.330061  |
| 1 | 0.884150  | 2.211804  | 0.330061  |
| 6 | -0.000000 | -2.504755 | -1.626065 |
| 6 | 1.260384  | -3.152501 | -2.209295 |
| 6 | -0.000000 | -2.668403 | -0.114505 |
| 6 | -1.260384 | -3.152501 | -2.209295 |
| 1 | 1.283158  | -3.088313 | -3.299149 |
| 1 | 2.152073  | -2.660888 | -1.814893 |
| 1 | 1.292993  | -4.208730 | -1.933619 |
| 1 | -0.884150 | -2.211804 | 0.330061  |
| 1 | -0.000000 | -3.735127 | 0.120515  |
| 1 | 0.884150  | -2.211804 | 0.330061  |
| 1 | -1.292993 | -4.208730 | -1.933619 |
| 1 | -2.152073 | -2.660888 | -1.814893 |
| 1 | -1.283158 | -3.088313 | -3.299149 |

## IPh2-ClCN

|   |           |           |           |
|---|-----------|-----------|-----------|
| 7 | -1.376718 | 0.086386  | 1.060947  |
| 6 | -0.525360 | 0.167783  | -0.000000 |
| 7 | -1.376718 | 0.086386  | -1.060947 |
| 6 | -2.706630 | -0.041020 | -0.673994 |
| 6 | -2.706630 | -0.041020 | 0.673994  |
| 1 | -3.520875 | -0.073969 | 1.376992  |
| 1 | -3.520875 | -0.073969 | -1.376992 |
| 6 | -0.934596 | 0.103275  | 2.415255  |
| 6 | -1.590910 | -0.667159 | 3.369825  |
| 6 | 0.157648  | 0.889983  | 2.769522  |
| 6 | -1.156310 | -0.639452 | 4.690522  |
| 1 | -2.417604 | -1.304031 | 3.078386  |
| 6 | 0.592421  | 0.898765  | 4.088236  |
| 1 | 0.649771  | 1.480662  | 2.007686  |
| 6 | -0.064308 | 0.140376  | 5.053395  |
| 1 | -1.666090 | -1.241856 | 5.432607  |
| 1 | 1.444234  | 1.508656  | 4.363919  |
| 1 | 0.276264  | 0.154781  | 6.081344  |
| 6 | -0.934596 | 0.103275  | -2.415255 |
| 6 | -1.590910 | -0.667159 | -3.369825 |
| 6 | 0.157648  | 0.889983  | -2.769522 |
| 6 | -1.156310 | -0.639452 | -4.690522 |
| 1 | -2.417604 | -1.304031 | -3.078386 |
| 6 | 0.592421  | 0.898765  | -4.088236 |
| 1 | 0.649771  | 1.480662  | -2.007686 |
| 6 | -0.064308 | 0.140376  | -5.053395 |
| 1 | -1.666090 | -1.241856 | -5.432607 |
| 1 | 1.444234  | 1.508656  | -4.363919 |

|    |          |           |           |
|----|----------|-----------|-----------|
| 1  | 0.276264 | 0.154781  | -6.081344 |
| 6  | 4.034808 | -0.481555 | 0.000000  |
| 17 | 2.406097 | -0.238599 | 0.000000  |
| 7  | 5.173507 | -0.648042 | 0.000000  |

### **IPh2-BrCN**

|    |           |           |           |
|----|-----------|-----------|-----------|
| 7  | -1.629737 | 0.083858  | 1.061600  |
| 6  | -0.783377 | 0.181979  | -0.000000 |
| 7  | -1.629737 | 0.083858  | -1.061600 |
| 6  | -2.955832 | -0.071908 | -0.674188 |
| 6  | -2.955832 | -0.071908 | 0.674188  |
| 1  | -3.767407 | -0.123349 | 1.379221  |
| 1  | -3.767407 | -0.123349 | -1.379221 |
| 6  | -1.190571 | 0.112656  | 2.417674  |
| 6  | -1.800655 | -0.709169 | 3.359701  |
| 6  | -0.150815 | 0.961765  | 2.783382  |
| 6  | -1.370802 | -0.671625 | 4.681500  |
| 1  | -2.586273 | -1.391050 | 3.056335  |
| 6  | 0.281064  | 0.979949  | 4.103162  |
| 1  | 0.304721  | 1.593780  | 2.031844  |
| 6  | -0.329162 | 0.169531  | 5.056142  |
| 1  | -1.843014 | -1.313951 | 5.414837  |
| 1  | 1.093416  | 1.637187  | 4.388584  |
| 1  | 0.008710  | 0.191155  | 6.084854  |
| 6  | -1.190571 | 0.112656  | -2.417674 |
| 6  | -1.800655 | -0.709169 | -3.359701 |
| 6  | -0.150815 | 0.961765  | -2.783382 |
| 6  | -1.370802 | -0.671625 | -4.681500 |
| 1  | -2.586273 | -1.391050 | -3.056335 |
| 6  | 0.281064  | 0.979949  | -4.103162 |
| 1  | 0.304721  | 1.593780  | -2.031844 |
| 6  | -0.329162 | 0.169531  | -5.056142 |
| 1  | -1.843014 | -1.313951 | -5.414837 |
| 1  | 1.093416  | 1.637187  | -4.388584 |
| 1  | 0.008710  | 0.191155  | -6.084854 |
| 6  | 3.881531  | -0.424864 | 0.000000  |
| 35 | 2.081399  | -0.174432 | 0.000000  |
| 7  | 5.022769  | -0.579073 | 0.000000  |

### **IPh2-ICN**

|   |           |           |           |
|---|-----------|-----------|-----------|
| 7 | -1.063643 | -1.777085 | -0.065620 |
| 6 | 0.000095  | -0.942550 | -0.189859 |
| 7 | 1.063900  | -1.776995 | -0.065632 |
| 6 | 0.674809  | -3.094757 | 0.136718  |
| 6 | -0.674437 | -3.094807 | 0.136771  |
| 1 | -1.382823 | -3.901040 | 0.218699  |
| 1 | 1.383266  | -3.900931 | 0.218614  |
| 6 | -2.423767 | -1.344120 | -0.115027 |
| 6 | -3.341596 | -1.861332 | 0.792373  |
| 6 | -2.810496 | -0.409506 | -1.068990 |
| 6 | -4.665430 | -1.440623 | 0.736977  |
| 1 | -3.016372 | -2.565683 | 1.549091  |

|    |           |           |           |
|----|-----------|-----------|-----------|
| 6  | -4.132189 | 0.015997  | -1.105088 |
| 1  | -2.076493 | -0.025420 | -1.766163 |
| 6  | -5.062042 | -0.500452 | -0.207932 |
| 1  | -5.382517 | -1.837558 | 1.445030  |
| 1  | -4.435863 | 0.749803  | -1.841458 |
| 1  | -6.092037 | -0.167644 | -0.242573 |
| 6  | 2.423986  | -1.343896 | -0.115020 |
| 6  | 3.341868  | -1.861073 | 0.792344  |
| 6  | 2.810620  | -0.409198 | -1.068940 |
| 6  | 4.665663  | -1.440238 | 0.736962  |
| 1  | 3.016716  | -2.565499 | 1.549023  |
| 6  | 4.132273  | 0.016429  | -1.105024 |
| 1  | 2.076577  | -0.025148 | -1.766090 |
| 6  | 5.062179  | -0.499980 | -0.207899 |
| 1  | 5.382792  | -1.837146 | 1.444986  |
| 1  | 4.435875  | 0.750301  | -1.841358 |
| 1  | 6.092143  | -0.167074 | -0.242529 |
| 6  | -0.000385 | 3.792526  | 0.437675  |
| 53 | -0.000116 | 1.742419  | 0.120664  |
| 7  | -0.000543 | 4.932692  | 0.611723  |

## IPh2-CICCH

|    |           |           |           |
|----|-----------|-----------|-----------|
| 7  | -1.410113 | 0.092500  | 1.060689  |
| 6  | -0.554049 | 0.137353  | 0.000000  |
| 7  | -1.410113 | 0.092500  | -1.060689 |
| 6  | -2.744887 | 0.024996  | -0.673799 |
| 6  | -2.744887 | 0.024996  | 0.673799  |
| 1  | -3.560913 | 0.028983  | 1.375387  |
| 1  | -3.560913 | 0.028983  | -1.375387 |
| 6  | -0.969109 | 0.092215  | 2.414978  |
| 6  | -1.680460 | -0.616988 | 3.377980  |
| 6  | 0.177693  | 0.800775  | 2.762654  |
| 6  | -1.247951 | -0.603881 | 4.699661  |
| 1  | -2.550151 | -1.197046 | 3.093446  |
| 6  | 0.608502  | 0.795099  | 4.082481  |
| 1  | 0.716051  | 1.339405  | 1.993814  |
| 6  | -0.103610 | 0.099931  | 5.056192  |
| 1  | -1.801616 | -1.158585 | 5.447568  |
| 1  | 1.502845  | 1.343874  | 4.351976  |
| 1  | 0.234711  | 0.103434  | 6.085045  |
| 6  | -0.969109 | 0.092215  | -2.414978 |
| 6  | -1.680460 | -0.616988 | -3.377980 |
| 6  | 0.177693  | 0.800775  | -2.762654 |
| 6  | -1.247951 | -0.603881 | -4.699661 |
| 1  | -2.550151 | -1.197046 | -3.093446 |
| 6  | 0.608502  | 0.795099  | -4.082481 |
| 1  | 0.716051  | 1.339405  | -1.993814 |
| 6  | -0.103610 | 0.099931  | -5.056192 |
| 1  | -1.801616 | -1.158585 | -5.447568 |
| 1  | 1.502845  | 1.343874  | -4.351976 |
| 1  | 0.234711  | 0.103434  | -6.085045 |
| 6  | 4.132525  | -0.405537 | -0.000000 |
| 6  | 5.325206  | -0.529286 | -0.000000 |
| 1  | 6.382014  | -0.643362 | -0.000000 |
| 17 | 2.492557  | -0.228983 | -0.000000 |



## IPh2-BrCCH

|    |           |           |           |
|----|-----------|-----------|-----------|
| 7  | -1.063592 | -1.683824 | -0.085242 |
| 6  | -0.001705 | -0.833245 | -0.166378 |
| 7  | 1.058501  | -1.685918 | -0.085375 |
| 6  | 0.670078  | -3.015493 | 0.040808  |
| 6  | -0.677759 | -3.014165 | 0.040883  |
| 1  | -1.381588 | -3.827667 | 0.073110  |
| 1  | 1.372335  | -3.830358 | 0.072973  |
| 6  | -2.418634 | -1.243712 | -0.104296 |
| 6  | -3.373107 | -1.903728 | 0.663352  |
| 6  | -2.773772 | -0.151085 | -0.889699 |
| 6  | -4.695038 | -1.473329 | 0.633044  |
| 1  | -3.080653 | -2.730133 | 1.300136  |
| 6  | -4.093686 | 0.279839  | -0.900403 |
| 1  | -2.012076 | 0.347213  | -1.475151 |
| 6  | -5.059040 | -0.381110 | -0.146050 |
| 1  | -5.437009 | -1.986113 | 1.233092  |
| 1  | -4.369135 | 1.133511  | -1.507743 |
| 1  | -6.087969 | -0.043410 | -0.162306 |
| 6  | 2.414378  | -1.248402 | -0.104544 |
| 6  | 3.367518  | -1.909822 | 0.663543  |
| 6  | 2.771620  | -0.156838 | -0.890464 |
| 6  | 4.690241  | -1.481867 | 0.633208  |
| 1  | 3.073419  | -2.735382 | 1.300671  |
| 6  | 4.092321  | 0.271669  | -0.901185 |
| 1  | 2.010929  | 0.342484  | -1.476365 |
| 6  | 5.056341  | -0.390679 | -0.146350 |
| 1  | 5.431197  | -1.995718 | 1.233597  |
| 1  | 4.369435  | 1.124526  | -1.508914 |
| 1  | 6.085890  | -0.054875 | -0.162615 |
| 6  | 0.006966  | 3.984063  | 0.369532  |
| 6  | 0.009040  | 5.177718  | 0.501153  |
| 1  | 0.010868  | 6.234433  | 0.620502  |
| 35 | 0.003869  | 2.187166  | 0.167897  |

## IPh2-ICCH

|   |           |           |           |
|---|-----------|-----------|-----------|
| 7 | -1.062507 | -1.876525 | -0.057368 |
| 6 | -0.000428 | -1.036981 | -0.198302 |
| 7 | 1.061264  | -1.877000 | -0.057400 |
| 6 | 0.673303  | -3.192865 | 0.166501  |
| 6 | -0.675121 | -3.192565 | 0.166513  |
| 1 | -1.380741 | -3.999897 | 0.259694  |
| 1 | 1.378596  | -4.000484 | 0.259693  |
| 6 | -2.419463 | -1.441388 | -0.110771 |
| 6 | -3.359678 | -2.004352 | 0.745975  |
| 6 | -2.786796 | -0.453354 | -1.018591 |
| 6 | -4.682275 | -1.579969 | 0.684170  |
| 1 | -3.054047 | -2.748115 | 1.472367  |
| 6 | -4.107300 | -0.025566 | -1.060889 |
| 1 | -2.035836 | -0.030620 | -1.673692 |
| 6 | -5.058790 | -0.589520 | -0.216111 |
| 1 | -5.414428 | -2.014951 | 1.353600  |
| 1 | -4.393541 | 0.748400  | -1.762520 |

|    |           |           |           |
|----|-----------|-----------|-----------|
| 1  | -6.088071 | -0.254962 | -0.256495 |
| 6  | 2.418424  | -1.442499 | -0.110839 |
| 6  | 3.358130  | -2.005106 | 0.746698  |
| 6  | 2.786451  | -0.455477 | -1.019471 |
| 6  | 4.680925  | -1.581344 | 0.684921  |
| 1  | 3.051916  | -2.748099 | 1.473635  |
| 6  | 4.107153  | -0.028282 | -1.061743 |
| 1  | 2.035918  | -0.033115 | -1.675306 |
| 6  | 5.058127  | -0.591853 | -0.216134 |
| 1  | 5.412693  | -2.016031 | 1.354961  |
| 1  | 4.393954  | 0.744903  | -1.764006 |
| 1  | 6.087560  | -0.257760 | -0.256494 |
| 6  | 0.001465  | 3.900288  | 0.400083  |
| 6  | 0.001928  | 5.092934  | 0.567623  |
| 1  | 0.002356  | 6.146585  | 0.716461  |
| 53 | 0.000680  | 1.896344  | 0.120824  |

## IMes2-CICN

|   |           |           |           |
|---|-----------|-----------|-----------|
| 7 | 1.579124  | -0.880267 | 0.398988  |
| 6 | 0.398046  | -0.275236 | 0.086214  |
| 7 | -0.509660 | -1.208994 | 0.493664  |
| 6 | 0.078624  | -2.342160 | 1.037526  |
| 6 | 1.412283  | -2.132888 | 0.976682  |
| 1 | 2.245282  | -2.741414 | 1.286982  |
| 1 | -0.498200 | -3.172375 | 1.409827  |
| 6 | 2.860457  | -0.287186 | 0.153516  |
| 6 | 3.603221  | -0.720390 | -0.945524 |
| 6 | 3.325003  | 0.701256  | 1.022968  |
| 6 | 4.853689  | -0.143086 | -1.157547 |
| 6 | 4.579672  | 1.251713  | 0.772109  |
| 6 | 5.356156  | 0.842427  | -0.310779 |
| 1 | 5.444870  | -0.466995 | -2.008737 |
| 1 | 4.959509  | 2.019267  | 1.439698  |
| 6 | -1.921911 | -0.995454 | 0.367292  |
| 6 | -2.537952 | -1.281671 | -0.850570 |
| 6 | -2.606954 | -0.399658 | 1.427044  |
| 6 | -3.882714 | -0.946252 | -0.996017 |
| 6 | -3.949678 | -0.080945 | 1.239241  |
| 6 | -4.599500 | -0.334356 | 0.031282  |
| 1 | -4.375766 | -1.145528 | -1.942604 |
| 1 | -4.495055 | 0.400913  | 2.044983  |
| 6 | 6.695489  | 1.479228  | -0.578632 |
| 1 | 7.356960  | 0.797030  | -1.114432 |
| 1 | 6.577310  | 2.377982  | -1.190196 |
| 1 | 7.184675  | 1.773315  | 0.351259  |
| 6 | -6.023700 | 0.104022  | -0.179095 |
| 1 | -6.590962 | 0.065792  | 0.752109  |
| 1 | -6.040004 | 1.135899  | -0.543000 |
| 1 | -6.525682 | -0.522780 | -0.917486 |
| 6 | 2.481567  | 1.161293  | 2.181697  |
| 1 | 1.593926  | 1.685123  | 1.818492  |
| 1 | 2.132330  | 0.313392  | 2.776288  |
| 1 | 3.047831  | 1.832439  | 2.827457  |
| 6 | -1.883268 | -0.044713 | 2.698196  |

|    |           |           |           |
|----|-----------|-----------|-----------|
| 1  | -1.412409 | -0.921020 | 3.149971  |
| 1  | -1.086811 | 0.675459  | 2.488566  |
| 1  | -2.569101 | 0.393164  | 3.423143  |
| 6  | 3.053533  | -1.766801 | -1.878680 |
| 1  | 3.005678  | -2.746575 | -1.396245 |
| 1  | 2.037574  | -1.509421 | -2.187531 |
| 1  | 3.679489  | -1.855394 | -2.766517 |
| 6  | -1.743851 | -1.856833 | -1.992283 |
| 1  | -1.020306 | -1.119341 | -2.351985 |
| 1  | -1.177957 | -2.738252 | -1.682167 |
| 1  | -2.399781 | -2.134053 | -2.817392 |
| 6  | -3.133727 | 2.603736  | -1.009224 |
| 7  | -4.198590 | 3.018279  | -1.150352 |
| 17 | -1.626848 | 1.993175  | -0.801122 |

# IMes2-BrCN

|   |           |           |           |
|---|-----------|-----------|-----------|
| 7 | 1.358003  | -1.295003 | 0.288448  |
| 6 | 0.222141  | -0.581956 | 0.064894  |
| 7 | -0.752836 | -1.497341 | 0.306018  |
| 6 | -0.246229 | -2.736995 | 0.671667  |
| 6 | 1.099234  | -2.607736 | 0.660465  |
| 1 | 1.885454  | -3.308819 | 0.885200  |
| 1 | -0.881994 | -3.574748 | 0.904927  |
| 6 | 2.675194  | -0.740504 | 0.172482  |
| 6 | 3.461902  | -1.094320 | -0.924243 |
| 6 | 3.125526  | 0.136303  | 1.162299  |
| 6 | 4.743344  | -0.553048 | -1.009314 |
| 6 | 4.412028  | 0.653462  | 1.034449  |
| 6 | 5.233257  | 0.320854  | -0.041831 |
| 1 | 5.368549  | -0.814508 | -1.857519 |
| 1 | 4.781926  | 1.333798  | 1.795574  |
| 6 | -2.150742 | -1.185681 | 0.216201  |
| 6 | -2.820776 | -1.431973 | -0.981707 |
| 6 | -2.781198 | -0.615610 | 1.323207  |
| 6 | -4.174076 | -1.107478 | -1.048249 |
| 6 | -4.134164 | -0.305934 | 1.211721  |
| 6 | -4.844338 | -0.544210 | 0.035895  |
| 1 | -4.713984 | -1.290501 | -1.972143 |
| 1 | -4.643616 | 0.139039  | 2.060960  |
| 6 | 6.608023  | 0.924024  | -0.170679 |
| 1 | 7.255086  | 0.303203  | -0.791587 |
| 1 | 6.550138  | 1.913329  | -0.632642 |
| 1 | 7.078879  | 1.042317  | 0.806575  |
| 6 | -6.297670 | -0.161577 | -0.071513 |
| 1 | -6.808837 | -0.283186 | 0.884678  |
| 1 | -6.394626 | 0.886003  | -0.369294 |
| 1 | -6.811954 | -0.769110 | -0.817276 |
| 6 | 2.241179  | 0.518816  | 2.319155  |
| 1 | 1.438313  | 1.179878  | 1.982521  |
| 1 | 1.768922  | -0.360069 | 2.764775  |
| 1 | 2.817579  | 1.034648  | 3.087109  |
| 6 | -2.003487 | -0.316258 | 2.576678  |
| 1 | -1.464405 | -1.197896 | 2.931938  |
| 1 | -1.258740 | 0.460981  | 2.382393  |

|    |           |           |           |
|----|-----------|-----------|-----------|
| 1  | -2.667369 | 0.029571  | 3.368670  |
| 6  | 2.931389  | -2.017165 | -1.990061 |
| 1  | 2.866421  | -3.047960 | -1.631773 |
| 1  | 1.926673  | -1.716763 | -2.296328 |
| 1  | 3.582294  | -2.004476 | -2.864108 |
| 6  | -2.084085 | -1.995481 | -2.167419 |
| 1  | -1.279067 | -1.319449 | -2.468068 |
| 1  | -1.625958 | -2.959486 | -1.932992 |
| 1  | -2.759416 | -2.130156 | -3.011980 |
| 6  | -1.276790 | 3.754753  | -0.698418 |
| 7  | -1.688528 | 4.818800  | -0.856233 |
| 35 | -0.630420 | 2.068442  | -0.441466 |

## IMes2-ICN

|   |           |           |           |
|---|-----------|-----------|-----------|
| 7 | 1.064634  | -1.580993 | 0.146667  |
| 6 | -0.000239 | -0.753480 | 0.053384  |
| 7 | -1.065251 | -1.580824 | 0.146652  |
| 6 | -0.676950 | -2.903648 | 0.298944  |
| 6 | 0.676124  | -2.903755 | 0.298968  |
| 1 | 1.391566  | -3.703161 | 0.394982  |
| 1 | -1.392522 | -3.702940 | 0.394940  |
| 6 | 2.427409  | -1.125284 | 0.111863  |
| 6 | 3.114255  | -1.160809 | -1.101633 |
| 6 | 2.999344  | -0.640821 | 1.288123  |
| 6 | 4.431864  | -0.711100 | -1.111603 |
| 6 | 4.319399  | -0.200460 | 1.229635  |
| 6 | 5.048085  | -0.228575 | 0.042044  |
| 1 | 4.986047  | -0.727833 | -2.044857 |
| 1 | 4.786099  | 0.180965  | 2.132398  |
| 6 | -2.427942 | -1.124859 | 0.111810  |
| 6 | -3.114803 | -1.160412 | -1.101653 |
| 6 | -2.999793 | -0.640196 | 1.288049  |
| 6 | -4.432366 | -0.710501 | -1.111655 |
| 6 | -4.319753 | -0.199609 | 1.229522  |
| 6 | -5.048475 | -0.227737 | 0.041929  |
| 1 | -4.986559 | -0.727263 | -2.044899 |
| 1 | -4.786377 | 0.182007  | 2.132247  |
| 6 | 6.460735  | 0.292465  | -0.004169 |
| 1 | 7.047441  | -0.224917 | -0.764457 |
| 1 | 6.464301  | 1.358257  | -0.248081 |
| 1 | 6.958182  | 0.169982  | 0.958798  |
| 6 | -6.461018 | 0.293606  | -0.004173 |
| 1 | -6.959555 | 0.167982  | 0.957836  |
| 1 | -6.464184 | 1.360215  | -0.244495 |
| 1 | -7.046925 | -0.221174 | -0.766825 |
| 6 | 2.198183  | -0.564737 | 2.560153  |
| 1 | 1.424751  | 0.204303  | 2.473179  |
| 1 | 1.695860  | -1.511052 | 2.774833  |
| 1 | 2.839961  | -0.311969 | 3.403720  |
| 6 | -2.198636 | -0.564231 | 2.560089  |
| 1 | -1.696740 | -1.510736 | 2.774935  |
| 1 | -1.424861 | 0.204452  | 2.473042  |
| 1 | -2.840341 | -0.311052 | 3.403587  |
| 6 | 2.430887  | -1.634852 | -2.356539 |

|    |           |           |           |
|----|-----------|-----------|-----------|
| 1  | 2.080319  | -2.665326 | -2.259329 |
| 1  | 1.557729  | -1.012534 | -2.571278 |
| 1  | 3.109978  | -1.581756 | -3.206893 |
| 6  | -2.431565 | -1.634814 | -2.356490 |
| 1  | -1.557573 | -1.013497 | -2.570717 |
| 1  | -2.082292 | -2.665755 | -2.259491 |
| 1  | -3.110301 | -1.580633 | -3.207056 |
| 6  | 0.001191  | 3.894698  | -0.379168 |
| 53 | 0.000443  | 1.775789  | -0.194819 |
| 7  | 0.001603  | 5.044857  | -0.476931 |

## IMes2-CICCH

|   |           |           |           |
|---|-----------|-----------|-----------|
| 7 | 0.454462  | -1.228771 | 0.459379  |
| 6 | -0.441969 | -0.274911 | 0.073653  |
| 7 | -1.629717 | -0.876601 | 0.373365  |
| 6 | -1.476709 | -2.144522 | 0.921246  |
| 6 | -0.145464 | -2.368805 | 0.976659  |
| 1 | 0.422783  | -3.213509 | 1.329042  |
| 1 | -2.315910 | -2.751774 | 1.217087  |
| 6 | 1.869451  | -1.035033 | 0.339784  |
| 6 | 2.480484  | -1.287695 | -0.887576 |
| 6 | 2.565434  | -0.495948 | 1.422224  |
| 6 | 3.834203  | -0.984001 | -1.016527 |
| 6 | 3.916791  | -0.207935 | 1.250760  |
| 6 | 4.563271  | -0.438010 | 0.037432  |
| 1 | 4.321823  | -1.149135 | -1.972508 |
| 1 | 4.469006  | 0.238221  | 2.072336  |
| 6 | -2.904951 | -0.267103 | 0.139688  |
| 6 | -3.650940 | -0.671046 | -0.968515 |
| 6 | -3.356794 | 0.715878  | 1.021780  |
| 6 | -4.893456 | -0.074553 | -1.173235 |
| 6 | -4.603861 | 1.286785  | 0.777695  |
| 6 | -5.386947 | 0.899899  | -0.308421 |
| 1 | -5.483482 | -0.370864 | -2.035274 |
| 1 | -4.970329 | 2.055480  | 1.451431  |
| 6 | 6.019033  | -0.091751 | -0.131881 |
| 1 | 6.245115  | 0.141755  | -1.173521 |
| 1 | 6.284930  | 0.772848  | 0.478819  |
| 1 | 6.656487  | -0.926826 | 0.172325  |
| 6 | -6.747455 | 1.509060  | -0.530454 |
| 1 | -7.513934 | 0.945884  | 0.009258  |
| 1 | -6.780387 | 2.539622  | -0.173761 |
| 1 | -7.013927 | 1.502970  | -1.588368 |
| 6 | 1.843235  | -0.155796 | 2.697971  |
| 1 | 1.077372  | 0.600499  | 2.502360  |
| 1 | 1.335203  | -1.027355 | 3.117470  |
| 1 | 2.537544  | 0.233253  | 3.442581  |
| 6 | -2.503888 | 1.155398  | 2.181393  |
| 1 | -2.161266 | 0.297370  | 2.765244  |
| 1 | -1.612134 | 1.672647  | 1.818985  |
| 1 | -3.060664 | 1.825535  | 2.836512  |
| 6 | 1.672617  | -1.783874 | -2.055993 |
| 1 | 1.060311  | -2.646061 | -1.782020 |
| 1 | 0.991363  | -0.997983 | -2.394854 |

|    |           |           |           |
|----|-----------|-----------|-----------|
| 1  | 2.323541  | -2.064352 | -2.884138 |
| 6  | -3.107119 | -1.699891 | -1.924400 |
| 1  | -2.089688 | -1.440865 | -2.227209 |
| 1  | -3.064210 | -2.690161 | -1.463423 |
| 1  | -3.733745 | -1.765599 | -2.813824 |
| 6  | 3.336697  | 2.674846  | -0.923245 |
| 6  | 4.449710  | 3.101662  | -1.056345 |
| 1  | 5.432908  | 3.486707  | -1.178048 |
| 17 | 1.816461  | 2.076081  | -0.737521 |

# IMes2-BrCCH

|   |           |           |           |
|---|-----------|-----------|-----------|
| 7 | 1.487017  | -1.236889 | 0.334014  |
| 6 | 0.324365  | -0.588361 | 0.045091  |
| 7 | -0.611083 | -1.525684 | 0.359887  |
| 6 | -0.056905 | -2.708996 | 0.829979  |
| 6 | 1.281659  | -2.524557 | 0.813334  |
| 1 | 2.094412  | -3.171462 | 1.098296  |
| 1 | -0.658619 | -3.551052 | 1.129056  |
| 6 | 2.781408  | -0.642804 | 0.177017  |
| 6 | 3.595588  | -1.065538 | -0.874082 |
| 6 | 3.185474  | 0.341480  | 1.082768  |
| 6 | 4.856789  | -0.484715 | -0.998526 |
| 6 | 4.452375  | 0.894859  | 0.918199  |
| 6 | 5.300197  | 0.494716  | -0.113825 |
| 1 | 5.502068  | -0.799869 | -1.812854 |
| 1 | 4.785558  | 1.658850  | 1.614318  |
| 6 | -2.019836 | -1.284949 | 0.239225  |
| 6 | -2.652592 | -1.575823 | -0.968829 |
| 6 | -2.699460 | -0.730298 | 1.324255  |
| 6 | -4.017446 | -1.314662 | -1.067960 |
| 6 | -4.062841 | -0.485489 | 1.181806  |
| 6 | -4.735742 | -0.770140 | -0.005256 |
| 1 | -4.528554 | -1.533403 | -2.000567 |
| 1 | -4.609377 | -0.051762 | 2.013672  |
| 6 | 6.652848  | 1.136928  | -0.283999 |
| 1 | 7.317405  | 0.507162  | -0.876791 |
| 1 | 6.559121  | 2.099027  | -0.794967 |
| 1 | 7.125021  | 1.320851  | 0.682650  |
| 6 | -6.202252 | -0.455125 | -0.149506 |
| 1 | -6.723016 | -0.556424 | 0.803887  |
| 1 | -6.338707 | 0.573105  | -0.495611 |
| 1 | -6.678774 | -1.116604 | -0.874413 |
| 6 | 2.271329  | 0.795993  | 2.189066  |
| 1 | 1.439723  | 1.375811  | 1.780401  |
| 1 | 1.838843  | -0.056246 | 2.719096  |
| 1 | 2.813760  | 1.415439  | 2.903493  |
| 6 | -1.958853 | -0.368627 | 2.583478  |
| 1 | -1.409554 | -1.223744 | 2.984882  |
| 1 | -1.226903 | 0.417056  | 2.374059  |
| 1 | -2.648454 | -0.007862 | 3.346431  |
| 6 | 3.113551  | -2.101934 | -1.855327 |
| 1 | 3.089027  | -3.098593 | -1.406782 |
| 1 | 2.099375  | -1.872683 | -2.190632 |
| 1 | 3.770613  | -2.139153 | -2.724205 |

|    |           |           |           |
|----|-----------|-----------|-----------|
| 6  | -1.864110 | -2.113786 | -2.132515 |
| 1  | -1.122526 | -1.377757 | -2.454833 |
| 1  | -1.320764 | -3.022068 | -1.860709 |
| 1  | -2.521068 | -2.339401 | -2.972365 |
| 6  | -1.787079 | 3.670926  | -0.647547 |
| 6  | -2.359411 | 4.719609  | -0.772289 |
| 1  | -2.865524 | 5.648121  | -0.883950 |
| 35 | -0.923113 | 2.091669  | -0.458463 |

## IMes2-ICCH

|   |           |           |           |
|---|-----------|-----------|-----------|
| 7 | -1.228748 | 1.580840  | 0.221715  |
| 6 | -0.124041 | 0.807098  | 0.064589  |
| 7 | 0.890527  | 1.694823  | 0.221834  |
| 6 | 0.436372  | 2.982019  | 0.473703  |
| 6 | -0.913798 | 2.909317  | 0.473581  |
| 1 | -1.669354 | 3.660308  | 0.632899  |
| 1 | 1.107655  | 3.809587  | 0.631436  |
| 6 | -2.566113 | 1.065864  | 0.156988  |
| 6 | -3.319988 | 1.294160  | -0.995020 |
| 6 | -3.061684 | 0.345285  | 1.244989  |
| 6 | -4.617482 | 0.789255  | -1.034361 |
| 6 | -4.363737 | -0.142548 | 1.159672  |
| 6 | -5.153543 | 0.068921  | 0.031353  |
| 1 | -5.219067 | 0.954085  | -1.922997 |
| 1 | -4.769019 | -0.704249 | 1.995716  |
| 6 | 2.274347  | 1.318322  | 0.161293  |
| 6 | 2.959276  | 1.463720  | -1.044910 |
| 6 | 2.874848  | 0.792896  | 1.305901  |
| 6 | 4.299529  | 1.086326  | -1.080209 |
| 6 | 4.216247  | 0.427580  | 1.224349  |
| 6 | 4.941790  | 0.567523  | 0.042528  |
| 1 | 4.850865  | 1.190205  | -2.009654 |
| 1 | 4.703286  | 0.016340  | 2.103189  |
| 6 | -6.545142 | -0.503126 | -0.049863 |
| 1 | -7.183472 | 0.101415  | -0.695740 |
| 1 | -6.517985 | -1.515896 | -0.461159 |
| 1 | -7.006768 | -0.558113 | 0.937107  |
| 6 | 6.380563  | 0.126029  | -0.030499 |
| 1 | 6.882622  | 0.257794  | 0.929121  |
| 1 | 6.440755  | -0.933257 | -0.294784 |
| 1 | 6.928725  | 0.689595  | -0.786753 |
| 6 | -2.207152 | 0.087918  | 2.457259  |
| 1 | -1.433507 | -0.649572 | 2.225505  |
| 1 | -1.700079 | 0.997835  | 2.787078  |
| 1 | -2.813610 | -0.293143 | 3.278918  |
| 6 | 2.079279  | 0.596453  | 2.568291  |
| 1 | 1.540965  | 1.505595  | 2.847024  |
| 1 | 1.334408  | -0.191706 | 2.423500  |
| 1 | 2.731207  | 0.309458  | 3.393164  |
| 6 | -2.732481 | 2.041986  | -2.162753 |
| 1 | -2.568266 | 3.095686  | -1.922798 |
| 1 | -1.764414 | 1.618594  | -2.441624 |
| 1 | -3.397866 | 1.989680  | -3.024235 |
| 6 | 2.249561  | 1.975351  | -2.269884 |

|    |          |           |           |
|----|----------|-----------|-----------|
| 1  | 1.416866 | 1.314726  | -2.526367 |
| 1  | 1.833673 | 2.972491  | -2.105839 |
| 1  | 2.931416 | 2.021086  | -3.118701 |
| 6  | 0.587251 | -3.972383 | -0.475914 |
| 6  | 0.779776 | -5.156973 | -0.587700 |
| 1  | 0.949032 | -6.202794 | -0.687647 |
| 53 | 0.262593 | -1.966252 | -0.284745 |

## IDipp2-CICN

|   |           |           |           |
|---|-----------|-----------|-----------|
| 7 | 0.677358  | 0.213833  | -1.170041 |
| 6 | -0.241080 | 0.043487  | -0.176285 |
| 7 | -1.412561 | 0.046542  | -0.871764 |
| 6 | -1.229994 | 0.209789  | -2.239028 |
| 6 | 0.103151  | 0.325809  | -2.427995 |
| 1 | 0.688198  | 0.473133  | -3.320528 |
| 1 | -2.054429 | 0.229391  | -2.932124 |
| 6 | 2.081715  | 0.334149  | -0.898692 |
| 6 | 2.562639  | 1.557801  | -0.422999 |
| 6 | 2.899884  | -0.792479 | -1.070813 |
| 6 | 3.914672  | 1.628922  | -0.080164 |
| 6 | 4.242719  | -0.670315 | -0.720444 |
| 6 | 4.743582  | 0.526781  | -0.219871 |
| 1 | 4.319460  | 2.558564  | 0.304353  |
| 1 | 4.907461  | -1.517859 | -0.831791 |
| 1 | 5.788486  | 0.597922  | 0.058548  |
| 6 | -2.702540 | -0.129420 | -0.265767 |
| 6 | -3.486991 | 1.007868  | -0.022697 |
| 6 | -3.124992 | -1.425016 | 0.048342  |
| 6 | -4.742706 | 0.813710  | 0.549088  |
| 6 | -4.386438 | -1.567930 | 0.630102  |
| 6 | -5.187956 | -0.462845 | 0.873016  |
| 1 | -5.380515 | 1.665723  | 0.749108  |
| 1 | -4.743549 | -2.556180 | 0.895726  |
| 1 | -6.166321 | -0.594015 | 1.320563  |
| 6 | 2.323436  | -2.110967 | -1.562804 |
| 6 | 1.711324  | -2.894169 | -0.392558 |
| 6 | 3.345772  | -2.974501 | -2.304396 |
| 1 | 1.515789  | -1.880894 | -2.263377 |
| 1 | 0.926415  | -2.319497 | 0.101725  |
| 1 | 1.281873  | -3.834890 | -0.749339 |
| 1 | 2.481134  | -3.127638 | 0.349270  |
| 1 | 3.858425  | -2.411693 | -3.087616 |
| 1 | 4.098787  | -3.377457 | -1.622513 |
| 1 | 2.841116  | -3.825524 | -2.766614 |
| 6 | -2.234966 | -2.635513 | -0.170212 |
| 6 | -2.983112 | -3.807205 | -0.812873 |
| 6 | -1.602440 | -3.054022 | 1.163799  |
| 1 | -1.426962 | -2.346920 | -0.847827 |
| 1 | -3.479608 | -3.504535 | -1.737304 |
| 1 | -2.280900 | -4.610998 | -1.046315 |
| 1 | -3.738740 | -4.220589 | -0.140467 |
| 1 | -1.029378 | -2.229426 | 1.593202  |
| 1 | -2.379054 | -3.341671 | 1.878420  |
| 1 | -0.934613 | -3.907677 | 1.021455  |



|    |           |           |           |
|----|-----------|-----------|-----------|
| 6  | -2.944948 | 2.400174  | -0.300212 |
| 6  | -2.082531 | 2.860842  | 0.884996  |
| 6  | -4.035773 | 3.429305  | -0.600570 |
| 1  | -2.296265 | 2.340782  | -1.178541 |
| 1  | -1.277330 | 2.151265  | 1.087702  |
| 1  | -1.642715 | 3.840508  | 0.677290  |
| 1  | -2.698519 | 2.945536  | 1.784933  |
| 1  | -4.712126 | 3.084041  | -1.385722 |
| 1  | -4.629320 | 3.655565  | 0.288769  |
| 1  | -3.577830 | 4.364802  | -0.928838 |
| 6  | 1.674950  | 2.780819  | -0.265337 |
| 6  | 2.196806  | 3.949700  | -1.109492 |
| 6  | 1.550843  | 3.180648  | 1.208990  |
| 1  | 0.674024  | 2.530590  | -0.625396 |
| 1  | 2.286303  | 3.668335  | -2.161089 |
| 1  | 1.514852  | 4.800452  | -1.036699 |
| 1  | 3.179723  | 4.280225  | -0.763942 |
| 1  | 1.120417  | 2.368213  | 1.796968  |
| 1  | 2.529172  | 3.426967  | 1.630854  |
| 1  | 0.907894  | 4.058310  | 1.311727  |
| 6  | 2.444789  | -0.813385 | 3.525191  |
| 17 | 1.381044  | -0.482560 | 2.315208  |
| 7  | 3.191206  | -1.046315 | 4.369664  |

## IDipp2-BrCN

|   |           |           |           |
|---|-----------|-----------|-----------|
| 7 | 0.788127  | -0.037502 | -1.351107 |
| 6 | -0.180409 | -0.059083 | -0.396286 |
| 7 | -1.320484 | -0.037454 | -1.135233 |
| 6 | -1.073177 | -0.005943 | -2.500725 |
| 6 | 0.272087  | 0.003329  | -2.637839 |
| 1 | 0.901530  | 0.031021  | -3.511657 |
| 1 | -1.866576 | 0.008456  | -3.229175 |
| 6 | 2.186756  | 0.036254  | -1.032523 |
| 6 | 2.732184  | 1.288459  | -0.731707 |
| 6 | 2.935622  | -1.148898 | -1.015040 |
| 6 | 4.085124  | 1.334123  | -0.389749 |
| 6 | 4.281301  | -1.051639 | -0.667063 |
| 6 | 4.849434  | 0.177963  | -0.353246 |
| 1 | 4.543332  | 2.287035  | -0.149775 |
| 1 | 4.895380  | -1.943127 | -0.638193 |
| 1 | 5.897022  | 0.232309  | -0.081008 |
| 6 | -2.637165 | -0.059121 | -0.562095 |
| 6 | -3.308460 | 1.160167  | -0.389365 |
| 6 | -3.188212 | -1.291224 | -0.198463 |
| 6 | -4.586039 | 1.116191  | 0.164830  |
| 6 | -4.467624 | -1.282944 | 0.361060  |
| 6 | -5.159750 | -0.094395 | 0.536992  |
| 1 | -5.139715 | 2.034984  | 0.313555  |
| 1 | -4.923751 | -2.218094 | 0.665259  |
| 1 | -6.152912 | -0.107764 | 0.970649  |
| 6 | 2.284151  | -2.489679 | -1.312169 |
| 6 | 1.638473  | -3.057960 | -0.040167 |
| 6 | 3.253017  | -3.506909 | -1.918454 |
| 1 | 1.486330  | -2.318038 | -2.040702 |

|    |           |           |           |
|----|-----------|-----------|-----------|
| 1  | 0.885837  | -2.377158 | 0.361491  |
| 1  | 1.160669  | -4.018168 | -0.254168 |
| 1  | 2.398956  | -3.216517 | 0.729847  |
| 1  | 3.789889  | -3.093272 | -2.774979 |
| 1  | 3.987837  | -3.846370 | -1.184199 |
| 1  | 2.699999  | -4.387616 | -2.251700 |
| 6  | -2.420763 | -2.593277 | -0.343795 |
| 6  | -3.249289 | -3.679428 | -1.037002 |
| 6  | -1.936323 | -3.064283 | 1.033411  |
| 1  | -1.537997 | -2.404583 | -0.960362 |
| 1  | -3.621682 | -3.338098 | -2.005284 |
| 1  | -2.636450 | -4.569442 | -1.197848 |
| 1  | -4.107326 | -3.978067 | -0.429891 |
| 1  | -1.316218 | -2.301021 | 1.508416  |
| 1  | -2.787516 | -3.268188 | 1.689335  |
| 1  | -1.349224 | -3.981417 | 0.940637  |
| 6  | -2.631138 | 2.478769  | -0.724292 |
| 6  | -1.792806 | 2.950689  | 0.473913  |
| 6  | -3.613346 | 3.570840  | -1.152525 |
| 1  | -1.947541 | 2.303505  | -1.559895 |
| 1  | -1.051821 | 2.201319  | 0.761251  |
| 1  | -1.271881 | 3.880830  | 0.230153  |
| 1  | -2.440839 | 3.136577  | 1.335139  |
| 1  | -4.277941 | 3.226596  | -1.947999 |
| 1  | -4.227742 | 3.908532  | -0.314267 |
| 1  | -3.061218 | 4.439441  | -1.517632 |
| 6  | 1.918590  | 2.570057  | -0.798425 |
| 6  | 2.393817  | 3.439572  | -1.969657 |
| 6  | 1.974628  | 3.348283  | 0.520026  |
| 1  | 0.873347  | 2.307501  | -0.978733 |
| 1  | 2.325806  | 2.898185  | -2.916156 |
| 1  | 1.784320  | 4.343555  | -2.044448 |
| 1  | 3.434698  | 3.744074  | -1.830109 |
| 1  | 1.618792  | 2.737553  | 1.351745  |
| 1  | 2.992730  | 3.674426  | 0.747300  |
| 1  | 1.347359  | 4.240620  | 0.455318  |
| 6  | 1.298713  | 0.015986  | 4.039443  |
| 35 | 0.667487  | -0.018803 | 2.330813  |
| 7  | 1.700369  | 0.039691  | 5.118497  |

## IDipp2-ICN

|   |           |           |           |
|---|-----------|-----------|-----------|
| 7 | 1.063697  | 0.004470  | -1.368962 |
| 6 | 0.000132  | 0.000466  | -0.532430 |
| 7 | -1.063413 | -0.002767 | -1.368971 |
| 6 | -0.676452 | -0.006651 | -2.699985 |
| 6 | 0.676749  | 0.009506  | -2.699973 |
| 1 | 1.392417  | 0.020163  | -3.504898 |
| 1 | -1.392115 | -0.016608 | -3.504922 |
| 6 | 2.425144  | 0.064591  | -0.908855 |
| 6 | 2.945327  | 1.310273  | -0.545244 |
| 6 | 3.155490  | -1.129474 | -0.828529 |
| 6 | 4.257629  | 1.339876  | -0.070023 |
| 6 | 4.460701  | -1.045922 | -0.348531 |
| 6 | 5.004377  | 0.176144  | 0.031019  |

|    |           |           |           |
|----|-----------|-----------|-----------|
| 1  | 4.696712  | 2.286371  | 0.224563  |
| 1  | 5.061144  | -1.943243 | -0.265560 |
| 1  | 6.019841  | 0.218400  | 0.407082  |
| 6  | -2.424908 | -0.062794 | -0.909009 |
| 6  | -3.154584 | 1.131553  | -0.826939 |
| 6  | -2.945824 | -1.308734 | -0.547337 |
| 6  | -4.459904 | 1.047994  | -0.347214 |
| 6  | -4.258205 | -1.338350 | -0.072366 |
| 6  | -5.004316 | -0.174345 | 0.030375  |
| 1  | -5.059842 | 1.945533  | -0.262927 |
| 1  | -4.697856 | -2.285046 | 0.220720  |
| 1  | -6.019849 | -0.216610 | 0.406249  |
| 6  | 2.528756  | -2.463956 | -1.200762 |
| 6  | 1.793754  | -3.065053 | 0.006283  |
| 6  | 3.543582  | -3.465212 | -1.757703 |
| 1  | 1.786930  | -2.279817 | -1.983230 |
| 1  | 1.012630  | -2.398549 | 0.377024  |
| 1  | 1.334597  | -4.019009 | -0.267605 |
| 1  | 2.495917  | -3.244417 | 0.825133  |
| 1  | 4.140609  | -3.030296 | -2.562224 |
| 1  | 4.223378  | -3.820721 | -0.979604 |
| 1  | 3.019640  | -4.338722 | -2.151276 |
| 6  | -2.153608 | -2.597828 | -0.683441 |
| 6  | -2.760255 | -3.481463 | -1.780996 |
| 6  | -2.068410 | -3.353972 | 0.646568  |
| 1  | -1.132844 | -2.348217 | -0.983227 |
| 1  | -2.793621 | -2.956689 | -2.738716 |
| 1  | -2.168485 | -4.391513 | -1.906005 |
| 1  | -3.781086 | -3.775505 | -1.522572 |
| 1  | -1.641999 | -2.724960 | 1.430091  |
| 1  | -3.055266 | -3.688720 | 0.976422  |
| 1  | -1.437928 | -4.239206 | 0.533343  |
| 6  | -2.527111 | 2.466258  | -1.197086 |
| 6  | -1.792871 | 3.065662  | 0.011264  |
| 6  | -3.541193 | 3.468479  | -1.753661 |
| 1  | -1.784730 | 2.282813  | -1.979191 |
| 1  | -1.012299 | 2.398409  | 0.381837  |
| 1  | -1.333130 | 4.019767  | -0.261127 |
| 1  | -2.495632 | 3.244338  | 0.829752  |
| 1  | -4.137656 | 3.034688  | -2.559205 |
| 1  | -4.221559 | 3.823231  | -0.975717 |
| 1  | -3.016683 | 4.342322  | -2.145736 |
| 6  | 2.152506  | 2.599207  | -0.679431 |
| 6  | 2.759668  | 3.485500  | -1.774552 |
| 6  | 2.065660  | 3.352465  | 0.652109  |
| 1  | 1.132155  | 2.349701  | -0.980701 |
| 1  | 2.794271  | 2.962737  | -2.733324 |
| 1  | 2.167450  | 4.395441  | -1.898224 |
| 1  | 3.780064  | 3.779653  | -1.514541 |
| 1  | 1.638633  | 2.721628  | 1.433838  |
| 1  | 3.052075  | 3.686780  | 0.983728  |
| 1  | 1.435017  | 4.237744  | 0.540156  |
| 6  | -0.000296 | -0.004757 | 4.175480  |
| 53 | -0.000178 | -0.002216 | 2.068603  |
| 7  | -0.000382 | -0.006157 | 5.329429  |

## IDipp2-CICCH

|   |           |           |           |
|---|-----------|-----------|-----------|
| 7 | 0.564747  | 0.333277  | -1.159546 |
| 6 | -0.316548 | 0.093831  | -0.144749 |
| 7 | -1.504018 | 0.044403  | -0.814689 |
| 6 | -1.365499 | 0.241240  | -2.183119 |
| 6 | -0.046375 | 0.434891  | -2.401355 |
| 1 | 0.506754  | 0.630643  | -3.304865 |
| 1 | -2.206463 | 0.226884  | -2.856249 |
| 6 | 1.969627  | 0.507460  | -0.924715 |
| 6 | 2.406809  | 1.719712  | -0.383672 |
| 6 | 2.833897  | -0.567150 | -1.183915 |
| 6 | 3.761404  | 1.831105  | -0.062285 |
| 6 | 4.177208  | -0.405483 | -0.853448 |
| 6 | 4.635209  | 0.779198  | -0.286991 |
| 1 | 4.131600  | 2.750521  | 0.377411  |
| 1 | 4.875476  | -1.214633 | -1.027650 |
| 1 | 5.681265  | 0.879293  | -0.021783 |
| 6 | -2.765454 | -0.224414 | -0.184415 |
| 6 | -3.629056 | 0.851313  | 0.072159  |
| 6 | -3.084906 | -1.547299 | 0.138910  |
| 6 | -4.855378 | 0.565606  | 0.668799  |
| 6 | -4.320212 | -1.782191 | 0.746418  |
| 6 | -5.197197 | -0.739616 | 1.004247  |
| 1 | -5.551271 | 1.368050  | 0.879835  |
| 1 | -4.597527 | -2.793721 | 1.019484  |
| 1 | -6.154052 | -0.942155 | 1.471370  |
| 6 | 2.306245  | -1.883869 | -1.732327 |
| 6 | 1.763793  | -2.753874 | -0.589490 |
| 6 | 3.346491  | -2.657988 | -2.544385 |
| 1 | 1.469985  | -1.658288 | -2.399535 |
| 1 | 0.976500  | -2.237535 | -0.038163 |
| 1 | 1.359476  | -3.690588 | -0.984881 |
| 1 | 2.565795  | -2.993936 | 0.115450  |
| 1 | 3.809640  | -2.031663 | -3.310169 |
| 1 | 4.136881  | -3.058098 | -1.904382 |
| 1 | 2.869455  | -3.507908 | -3.037201 |
| 6 | -2.113861 | -2.689498 | -0.100993 |
| 6 | -2.792592 | -3.922586 | -0.704785 |
| 6 | -1.401655 | -3.043797 | 1.211418  |
| 1 | -1.356395 | -2.348101 | -0.811602 |
| 1 | -3.351442 | -3.668994 | -1.608238 |
| 1 | -2.037806 | -4.668656 | -0.964577 |
| 1 | -3.482122 | -4.390727 | 0.002020  |
| 1 | -0.868563 | -2.176421 | 1.606416  |
| 1 | -2.128925 | -3.373511 | 1.959294  |
| 1 | -0.683765 | -3.852775 | 1.051645  |
| 6 | -3.197570 | 2.279437  | -0.218059 |
| 6 | -2.329992 | 2.797106  | 0.939267  |
| 6 | -4.367605 | 3.229359  | -0.477531 |
| 1 | -2.575777 | 2.267929  | -1.117298 |
| 1 | -1.476624 | 2.139680  | 1.117478  |
| 1 | -1.958878 | 3.802021  | 0.717575  |
| 1 | -2.922236 | 2.844924  | 1.857775  |
| 1 | -5.043250 | 2.839778  | -1.242397 |
| 1 | -4.946305 | 3.409873  | 0.431907  |

|    |           |           |           |
|----|-----------|-----------|-----------|
| 1  | -3.987854 | 4.196063  | -0.815157 |
| 6  | 1.463139  | 2.877391  | -0.106268 |
| 6  | 1.954708  | 4.173156  | -0.761300 |
| 6  | 1.273577  | 3.062894  | 1.403799  |
| 1  | 0.487581  | 2.636906  | -0.536541 |
| 1  | 2.111374  | 4.040509  | -1.834031 |
| 1  | 1.218940  | 4.967918  | -0.615630 |
| 1  | 2.896409  | 4.510951  | -0.321307 |
| 1  | 0.855323  | 2.160865  | 1.853647  |
| 1  | 2.230493  | 3.275197  | 1.889459  |
| 1  | 0.597125  | 3.898101  | 1.603356  |
| 6  | 3.114936  | -1.043031 | 3.074529  |
| 6  | 4.087319  | -1.377517 | 3.691239  |
| 1  | 4.949013  | -1.671725 | 4.239574  |
| 17 | 1.783076  | -0.590750 | 2.219748  |

## IDipp2-BrCCH

|   |           |           |           |
|---|-----------|-----------|-----------|
| 7 | -0.714039 | -0.009421 | -1.398856 |
| 6 | 0.225115  | 0.045928  | -0.413850 |
| 7 | 1.385439  | 0.007921  | -1.123927 |
| 6 | 1.178314  | -0.066278 | -2.494933 |
| 6 | -0.162191 | -0.086301 | -2.669534 |
| 1 | -0.766318 | -0.143520 | -3.559685 |
| 1 | 1.991898  | -0.098985 | -3.200201 |
| 6 | -2.121110 | -0.080059 | -1.123267 |
| 6 | -2.673683 | -1.325245 | -0.807801 |
| 6 | -2.874779 | 1.101630  | -1.163688 |
| 6 | -4.038195 | -1.367900 | -0.514764 |
| 6 | -4.232117 | 1.008258  | -0.863670 |
| 6 | -4.807781 | -0.215040 | -0.538871 |
| 1 | -4.501065 | -2.316121 | -0.264959 |
| 1 | -4.849520 | 1.897825  | -0.880885 |
| 1 | -5.864840 | -0.266814 | -0.305126 |
| 6 | 2.686373  | 0.047906  | -0.518654 |
| 6 | 3.356002  | -1.164568 | -0.298424 |
| 6 | 3.226981  | 1.289607  | -0.172042 |
| 6 | 4.623206  | -1.103790 | 0.277712  |
| 6 | 4.495993  | 1.299080  | 0.410650  |
| 6 | 5.188362  | 0.117363  | 0.627581  |
| 1 | 5.174887  | -2.017383 | 0.461959  |
| 1 | 4.943636  | 2.242541  | 0.701303  |
| 1 | 6.173928  | 0.144415  | 1.077794  |
| 6 | -2.215502 | 2.436896  | -1.467143 |
| 6 | -1.617826 | 3.032320  | -0.184189 |
| 6 | -3.162543 | 3.438671  | -2.130696 |
| 1 | -1.390988 | 2.250732  | -2.161564 |
| 1 | -0.886949 | 2.356390  | 0.263250  |
| 1 | -1.126965 | 3.985352  | -0.401550 |
| 1 | -2.407733 | 3.211448  | 0.551013  |
| 1 | -3.665848 | 3.006146  | -2.998323 |
| 1 | -3.925422 | 3.791039  | -1.431896 |
| 1 | -2.599023 | 4.313984  | -2.460804 |
| 6 | 2.450906  | 2.582179  | -0.350261 |
| 6 | 3.290839  | 3.682595  | -1.005633 |

|    |           |           |           |
|----|-----------|-----------|-----------|
| 6  | 1.903334  | 3.040923  | 1.007747  |
| 1  | 1.596963  | 2.381818  | -1.002750 |
| 1  | 3.715226  | 3.347761  | -1.954649 |
| 1  | 2.669043  | 4.560323  | -1.197005 |
| 1  | 4.112806  | 3.999602  | -0.359122 |
| 1  | 1.274030  | 2.267070  | 1.452747  |
| 1  | 2.725374  | 3.252357  | 1.697890  |
| 1  | 1.309083  | 3.951228  | 0.894170  |
| 6  | 2.681823  | -2.492116 | -0.601911 |
| 6  | 1.817065  | -2.916749 | 0.595567  |
| 6  | 3.668172  | -3.601966 | -0.970357 |
| 1  | 2.016231  | -2.344035 | -1.457022 |
| 1  | 1.078128  | -2.151529 | 0.844654  |
| 1  | 1.293006  | -3.850532 | 0.372941  |
| 1  | 2.448521  | -3.079368 | 1.473794  |
| 1  | 4.349592  | -3.289343 | -1.764771 |
| 1  | 4.264858  | -3.910224 | -0.108204 |
| 1  | 3.120162  | -4.481949 | -1.313969 |
| 6  | -1.853157 | -2.603994 | -0.802983 |
| 6  | -2.294940 | -3.525398 | -1.947075 |
| 6  | -1.937929 | -3.323635 | 0.546780  |
| 1  | -0.805286 | -2.342509 | -0.968203 |
| 1  | -2.208477 | -3.023455 | -2.913631 |
| 1  | -1.677263 | -4.426731 | -1.969709 |
| 1  | -3.336550 | -3.832846 | -1.819439 |
| 1  | -1.600713 | -2.674358 | 1.356695  |
| 1  | -2.961361 | -3.639761 | 0.765064  |
| 1  | -1.309355 | -4.217498 | 0.535368  |
| 6  | -1.572930 | 0.136872  | 4.051885  |
| 6  | -2.052475 | 0.154973  | 5.152863  |
| 1  | -2.477616 | 0.171391  | 6.127482  |
| 35 | -0.847081 | 0.106659  | 2.394017  |

## IDipp2-ICCH

|   |           |           |           |
|---|-----------|-----------|-----------|
| 7 | 1.122772  | 0.047090  | -1.418771 |
| 6 | 0.042285  | 0.035008  | -0.596132 |
| 7 | -0.996839 | 0.059719  | -1.470833 |
| 6 | -0.580462 | 0.080904  | -2.793678 |
| 6 | 0.771799  | 0.083238  | -2.760345 |
| 1 | 1.506600  | 0.104373  | -3.547774 |
| 1 | -1.275525 | 0.094971  | -3.616562 |
| 6 | 2.473782  | 0.076268  | -0.932776 |
| 6 | 3.017366  | 1.307093  | -0.554527 |
| 6 | 3.179524  | -1.132649 | -0.846376 |
| 6 | 4.323225  | 1.307106  | -0.059735 |
| 6 | 4.480269  | -1.080074 | -0.350343 |
| 6 | 5.045347  | 0.128254  | 0.042711  |
| 1 | 4.775924  | 2.242591  | 0.249887  |
| 1 | 5.060372  | -1.990572 | -0.264875 |
| 1 | 6.056918  | 0.147216  | 0.431267  |
| 6 | -2.368821 | -0.005557 | -1.051096 |
| 6 | -3.091283 | 1.190618  | -0.934525 |
| 6 | -2.914742 | -1.259633 | -0.761803 |
| 6 | -4.411469 | 1.100716  | -0.498646 |

|    |           |           |           |
|----|-----------|-----------|-----------|
| 6  | -4.241270 | -1.297187 | -0.327654 |
| 6  | -4.979670 | -0.131479 | -0.194435 |
| 1  | -5.004954 | 2.000264  | -0.391937 |
| 1  | -4.698070 | -2.251751 | -0.091018 |
| 1  | -6.006988 | -0.179797 | 0.147429  |
| 6  | 2.524527  | -2.451043 | -1.225574 |
| 6  | 1.749414  | -3.021731 | -0.028685 |
| 6  | 3.520569  | -3.484116 | -1.757168 |
| 1  | 1.802983  | -2.249151 | -2.022506 |
| 1  | 0.984991  | -2.325913 | 0.322904  |
| 1  | 1.263992  | -3.961798 | -0.305848 |
| 1  | 2.431958  | -3.219731 | 0.802612  |
| 1  | 4.143744  | -3.072073 | -2.553997 |
| 1  | 4.176528  | -3.852613 | -0.964563 |
| 1  | 2.979574  | -4.345764 | -2.154078 |
| 6  | -2.128631 | -2.549406 | -0.923697 |
| 6  | -2.735614 | -3.412165 | -2.037076 |
| 6  | -2.050079 | -3.326238 | 0.394661  |
| 1  | -1.106423 | -2.297106 | -1.215721 |
| 1  | -2.768603 | -2.869095 | -2.984522 |
| 1  | -2.143434 | -4.319476 | -2.179544 |
| 1  | -3.756386 | -3.712430 | -1.785425 |
| 1  | -1.606788 | -2.714524 | 1.182641  |
| 1  | -3.042279 | -3.644100 | 0.726022  |
| 1  | -1.437840 | -4.222349 | 0.266570  |
| 6  | -2.436415 | 2.532040  | -1.222355 |
| 6  | -1.708631 | 3.047980  | 0.027724  |
| 6  | -3.423512 | 3.582592  | -1.736010 |
| 1  | -1.685794 | 2.376166  | -2.002687 |
| 1  | -0.947150 | 2.343360  | 0.367592  |
| 1  | -1.226749 | 4.006764  | -0.183833 |
| 1  | -2.420554 | 3.193897  | 0.845026  |
| 1  | -4.015420 | 3.206055  | -2.573231 |
| 1  | -4.109418 | 3.905828  | -0.949013 |
| 1  | -2.877523 | 4.467175  | -2.070723 |
| 6  | 2.244520  | 2.609982  | -0.666008 |
| 6  | 2.948075  | 3.583718  | -1.618802 |
| 6  | 2.034259  | 3.242479  | 0.714078  |
| 1  | 1.257398  | 2.392180  | -1.080891 |
| 1  | 3.085961  | 3.139648  | -2.607371 |
| 1  | 2.357601  | 4.496450  | -1.729690 |
| 1  | 3.932279  | 3.866750  | -1.236327 |
| 1  | 1.512472  | 2.555363  | 1.383151  |
| 1  | 2.990636  | 3.505765  | 1.174220  |
| 1  | 1.441109  | 4.156021  | 0.624571  |
| 6  | -0.250031 | -0.156381 | 4.308743  |
| 6  | -0.327352 | -0.207104 | 5.510038  |
| 1  | -0.395481 | -0.251677 | 6.571081  |
| 53 | -0.119983 | -0.072226 | 2.281534  |

#### IAd2-CICN

|   |           |           |           |
|---|-----------|-----------|-----------|
| 7 | -0.000000 | 1.065701  | -1.175877 |
| 6 | 0.000000  | -0.000000 | -0.322205 |
| 7 | -0.000000 | -1.065701 | -1.175877 |
| 6 | 0.000000  | -0.674103 | -2.505753 |

|    |           |           |           |
|----|-----------|-----------|-----------|
| 6  | 0.000000  | 0.674103  | -2.505753 |
| 1  | -0.000000 | 1.365605  | -3.330605 |
| 1  | -0.000000 | -1.365605 | -3.330605 |
| 6  | 0.000000  | -2.489396 | -0.787834 |
| 6  | 0.000000  | -2.631267 | 0.736248  |
| 6  | 1.256375  | -3.176973 | -1.352839 |
| 6  | -1.256375 | -3.176973 | -1.352839 |
| 1  | 0.879935  | -2.127625 | 1.144608  |
| 1  | -0.879935 | -2.127625 | 1.144608  |
| 6  | 0.000000  | -4.117159 | 1.124722  |
| 1  | 2.143171  | -2.672861 | -0.954450 |
| 1  | 1.281653  | -3.074611 | -2.442807 |
| 6  | 1.255851  | -4.664780 | -0.971148 |
| 1  | -2.143171 | -2.672861 | -0.954450 |
| 1  | -1.281653 | -3.074611 | -2.442807 |
| 6  | -1.255851 | -4.664780 | -0.971148 |
| 1  | 0.000000  | -4.193897 | 2.215586  |
| 6  | 1.254008  | -4.797835 | 0.558170  |
| 6  | -1.254008 | -4.797835 | 0.558170  |
| 1  | 2.150413  | -5.139901 | -1.383655 |
| 6  | 0.000000  | -5.337693 | -1.546322 |
| 1  | -2.150413 | -5.139901 | -1.383655 |
| 1  | 1.268788  | -5.855333 | 0.842283  |
| 1  | 2.153568  | -4.333765 | 0.976025  |
| 1  | -2.153568 | -4.333765 | 0.976025  |
| 1  | -1.268788 | -5.855333 | 0.842283  |
| 1  | 0.000000  | -5.260596 | -2.639266 |
| 1  | 0.000000  | -6.403434 | -1.294955 |
| 6  | 0.000000  | 2.489396  | -0.787834 |
| 6  | 1.256375  | 3.176973  | -1.352839 |
| 6  | 0.000000  | 2.631267  | 0.736248  |
| 6  | -1.256375 | 3.176973  | -1.352839 |
| 1  | 2.143171  | 2.672861  | -0.954450 |
| 1  | 1.281653  | 3.074611  | -2.442807 |
| 6  | 1.255851  | 4.664780  | -0.971148 |
| 1  | 0.879935  | 2.127625  | 1.144608  |
| 1  | -0.879935 | 2.127625  | 1.144608  |
| 6  | 0.000000  | 4.117159  | 1.124722  |
| 1  | -1.281653 | 3.074611  | -2.442807 |
| 1  | -2.143171 | 2.672861  | -0.954450 |
| 6  | -1.255851 | 4.664780  | -0.971148 |
| 1  | 2.150413  | 5.139901  | -1.383655 |
| 6  | 1.254008  | 4.797835  | 0.558170  |
| 6  | 0.000000  | 5.337693  | -1.546322 |
| 1  | 0.000000  | 4.193897  | 2.215586  |
| 6  | -1.254008 | 4.797835  | 0.558170  |
| 1  | -2.150413 | 5.139901  | -1.383655 |
| 1  | 1.268788  | 5.855333  | 0.842283  |
| 1  | 2.153568  | 4.333765  | 0.976025  |
| 1  | 0.000000  | 5.260596  | -2.639266 |
| 1  | 0.000000  | 6.403434  | -1.294955 |
| 1  | -2.153568 | 4.333765  | 0.976025  |
| 1  | -1.268788 | 5.855333  | 0.842283  |
| 6  | -0.000000 | 0.000000  | 4.459511  |
| 17 | -0.000000 | 0.000000  | 2.815479  |
| 7  | -0.000000 | 0.000000  | 5.610376  |



**IAd2-BrCN**

|   |           |           |           |
|---|-----------|-----------|-----------|
| 7 | -0.000000 | 1.066840  | -1.372724 |
| 6 | -0.000000 | -0.000000 | -0.518264 |
| 7 | -0.000000 | -1.066840 | -1.372724 |
| 6 | -0.000000 | -0.673465 | -2.701586 |
| 6 | 0.000000  | 0.673465  | -2.701586 |
| 1 | -0.000000 | 1.364375  | -3.526573 |
| 1 | -0.000000 | -1.364375 | -3.526573 |
| 6 | -0.000000 | -2.497794 | -1.005360 |
| 6 | 0.000000  | -2.669244 | 0.514289  |
| 6 | 1.256870  | -3.174798 | -1.582647 |
| 6 | -1.256870 | -3.174798 | -1.582647 |
| 1 | 0.881083  | -2.176210 | 0.932616  |
| 1 | -0.881083 | -2.176210 | 0.932616  |
| 6 | 0.000000  | -4.161987 | 0.875793  |
| 1 | 2.143518  | -2.678633 | -1.174077 |
| 1 | 1.283770  | -3.052852 | -2.670368 |
| 6 | 1.255853  | -4.669513 | -1.229507 |
| 1 | -2.143518 | -2.678633 | -1.174077 |
| 1 | -1.283770 | -3.052852 | -2.670368 |
| 6 | -1.255853 | -4.669513 | -1.229507 |
| 1 | 0.000000  | -4.257221 | 1.965079  |
| 6 | 1.253977  | -4.831970 | 0.296908  |
| 6 | -1.253977 | -4.831970 | 0.296908  |
| 1 | 2.150409  | -5.136408 | -1.651227 |
| 6 | -0.000000 | -5.330977 | -1.817764 |
| 1 | -2.150409 | -5.136408 | -1.651227 |
| 1 | 1.268182  | -5.894616 | 0.560914  |
| 1 | 2.153574  | -4.376409 | 0.723871  |
| 1 | -2.153574 | -4.376409 | 0.723871  |
| 1 | -1.268182 | -5.894616 | 0.560914  |
| 1 | -0.000000 | -5.232689 | -2.909025 |
| 1 | -0.000000 | -6.401366 | -1.587190 |
| 6 | 0.000000  | 2.497794  | -1.005360 |
| 6 | 1.256870  | 3.174798  | -1.582647 |
| 6 | 0.000000  | 2.669244  | 0.514289  |
| 6 | -1.256870 | 3.174798  | -1.582647 |
| 1 | 2.143518  | 2.678633  | -1.174077 |
| 1 | 1.283770  | 3.052852  | -2.670368 |
| 6 | 1.255853  | 4.669513  | -1.229507 |
| 1 | 0.881083  | 2.176210  | 0.932616  |
| 1 | -0.881083 | 2.176210  | 0.932616  |
| 6 | 0.000000  | 4.161987  | 0.875793  |
| 1 | -1.283770 | 3.052852  | -2.670368 |
| 1 | -2.143518 | 2.678633  | -1.174077 |
| 6 | -1.255853 | 4.669513  | -1.229507 |
| 1 | 2.150409  | 5.136408  | -1.651227 |
| 6 | 1.253977  | 4.831970  | 0.296908  |
| 6 | 0.000000  | 5.330977  | -1.817764 |
| 1 | 0.000000  | 4.257221  | 1.965079  |
| 6 | -1.253977 | 4.831970  | 0.296908  |
| 1 | -2.150409 | 5.136408  | -1.651227 |
| 1 | 1.268182  | 5.894616  | 0.560914  |
| 1 | 2.153574  | 4.376409  | 0.723871  |
| 1 | 0.000000  | 5.232689  | -2.909025 |

|    |           |          |           |
|----|-----------|----------|-----------|
| 1  | 0.000000  | 6.401366 | -1.587190 |
| 1  | -2.153574 | 4.376409 | 0.723871  |
| 1  | -1.268182 | 5.894616 | 0.560914  |
| 6  | 0.000000  | 0.000000 | 4.431914  |
| 35 | 0.000000  | 0.000000 | 2.624627  |
| 7  | 0.000000  | 0.000000 | 5.583463  |

# IAd2-ICN

|   |           |           |           |
|---|-----------|-----------|-----------|
| 7 | -0.000000 | 1.068832  | -1.531864 |
| 6 | 0.000000  | -0.000000 | -0.676348 |
| 7 | -0.000000 | -1.068832 | -1.531864 |
| 6 | 0.000000  | -0.672546 | -2.859094 |
| 6 | 0.000000  | 0.672546  | -2.859094 |
| 1 | -0.000000 | 1.362338  | -3.684459 |
| 1 | -0.000000 | -1.362338 | -3.684459 |
| 6 | 0.000000  | -2.510643 | -1.195164 |
| 6 | 0.000000  | -2.725854 | 0.316955  |
| 6 | 1.257665  | -3.171815 | -1.789986 |
| 6 | -1.257665 | -3.171815 | -1.789986 |
| 1 | 0.882699  | -2.248832 | 0.749626  |
| 1 | -0.882699 | -2.248832 | 0.749626  |
| 6 | 0.000000  | -4.227780 | 0.638637  |
| 1 | 2.144112  | -2.687711 | -1.366769 |
| 1 | 1.287119  | -3.021513 | -2.873780 |
| 6 | 1.255886  | -4.675807 | -1.478858 |
| 1 | -2.144112 | -2.687711 | -1.366769 |
| 1 | -1.287119 | -3.021513 | -2.873780 |
| 6 | -1.255886 | -4.675807 | -1.478858 |
| 1 | 0.000000  | -4.350070 | 1.725082  |
| 6 | 1.254033  | -4.881406 | 0.042192  |
| 6 | -1.254033 | -4.881406 | 0.042192  |
| 1 | 2.150426  | -5.130243 | -1.913851 |
| 6 | 0.000000  | -5.319934 | -2.085919 |
| 1 | -2.150426 | -5.130243 | -1.913851 |
| 1 | 1.267678  | -5.950920 | 0.276379  |
| 1 | 2.153543  | -4.438389 | 0.482228  |
| 1 | -2.153543 | -4.438389 | 0.482228  |
| 1 | -1.267678 | -5.950920 | 0.276379  |
| 1 | 0.000000  | -5.190515 | -3.173947 |
| 1 | 0.000000  | -6.396423 | -1.886182 |
| 6 | 0.000000  | 2.510643  | -1.195164 |
| 6 | 1.257665  | 3.171815  | -1.789986 |
| 6 | 0.000000  | 2.725854  | 0.316955  |
| 6 | -1.257665 | 3.171815  | -1.789986 |
| 1 | 2.144112  | 2.687711  | -1.366769 |
| 1 | 1.287119  | 3.021513  | -2.873780 |
| 6 | 1.255886  | 4.675807  | -1.478858 |
| 1 | 0.882699  | 2.248832  | 0.749626  |
| 1 | -0.882699 | 2.248832  | 0.749626  |
| 6 | 0.000000  | 4.227780  | 0.638637  |
| 1 | -1.287119 | 3.021513  | -2.873780 |
| 1 | -2.144112 | 2.687711  | -1.366769 |
| 6 | -1.255886 | 4.675807  | -1.478858 |
| 1 | 2.150426  | 5.130243  | -1.913851 |

|    |           |          |           |
|----|-----------|----------|-----------|
| 6  | 1.254033  | 4.881406 | 0.042192  |
| 6  | 0.000000  | 5.319934 | -2.085919 |
| 1  | 0.000000  | 4.350070 | 1.725082  |
| 6  | -1.254033 | 4.881406 | 0.042192  |
| 1  | -2.150426 | 5.130243 | -1.913851 |
| 1  | 1.267678  | 5.950920 | 0.276379  |
| 1  | 2.153543  | 4.438389 | 0.482228  |
| 1  | 0.000000  | 5.190515 | -3.173947 |
| 1  | 0.000000  | 6.396423 | -1.886182 |
| 1  | -2.153543 | 4.438389 | 0.482228  |
| 1  | -1.267678 | 5.950920 | 0.276379  |
| 6  | 0.000000  | 0.000000 | 4.501098  |
| 53 | 0.000000  | 0.000000 | 2.475464  |
| 7  | 0.000000  | 0.000000 | 5.653761  |

## IAd2-CICCH

|   |           |           |           |
|---|-----------|-----------|-----------|
| 7 | -0.000000 | 1.064843  | -1.225481 |
| 6 | -0.000000 | -0.000000 | -0.371879 |
| 7 | -0.000000 | -1.064843 | -1.225481 |
| 6 | -0.000000 | -0.674505 | -2.556147 |
| 6 | 0.000000  | 0.674505  | -2.556147 |
| 1 | -0.000000 | 1.366392  | -3.380943 |
| 1 | -0.000000 | -1.366392 | -3.380943 |
| 6 | -0.000000 | -2.483633 | -0.824159 |
| 6 | 0.000000  | -2.605640 | 0.702247  |
| 6 | 1.255971  | -3.177907 | -1.381319 |
| 6 | -1.255971 | -3.177907 | -1.381319 |
| 1 | 0.877629  | -2.094430 | 1.105651  |
| 1 | -0.877629 | -2.094430 | 1.105651  |
| 6 | 0.000000  | -4.086464 | 1.108340  |
| 1 | 2.142607  | -2.668625 | -0.989312 |
| 1 | 1.280504  | -3.088755 | -2.472673 |
| 6 | 1.255865  | -4.660880 | -0.980837 |
| 1 | -2.142607 | -2.668625 | -0.989312 |
| 1 | -1.280504 | -3.088755 | -2.472673 |
| 6 | -1.255865 | -4.660880 | -0.980837 |
| 1 | 0.000000  | -4.149437 | 2.200124  |
| 6 | 1.253818  | -4.774619 | 0.550164  |
| 6 | -1.253818 | -4.774619 | 0.550164  |
| 1 | 2.150403  | -5.141500 | -1.387316 |
| 6 | -0.000000 | -5.341169 | -1.547331 |
| 1 | -2.150403 | -5.141500 | -1.387316 |
| 1 | 1.269022  | -5.828766 | 0.847156  |
| 1 | 2.153173  | -4.304750 | 0.961919  |
| 1 | -2.153173 | -4.304750 | 0.961919  |
| 1 | -1.269022 | -5.828766 | 0.847156  |
| 1 | -0.000000 | -5.277860 | -2.641223 |
| 1 | -0.000000 | -6.403737 | -1.282372 |
| 6 | 0.000000  | 2.483633  | -0.824159 |
| 6 | 1.255971  | 3.177907  | -1.381319 |
| 6 | 0.000000  | 2.605640  | 0.702247  |
| 6 | -1.255971 | 3.177907  | -1.381319 |
| 1 | 2.142607  | 2.668625  | -0.989312 |
| 1 | 1.280504  | 3.088755  | -2.472673 |

|    |           |          |           |
|----|-----------|----------|-----------|
| 6  | 1.255865  | 4.660880 | -0.980837 |
| 1  | 0.877629  | 2.094430 | 1.105651  |
| 1  | -0.877629 | 2.094430 | 1.105651  |
| 6  | 0.000000  | 4.086464 | 1.108340  |
| 1  | -1.280504 | 3.088755 | -2.472673 |
| 1  | -2.142607 | 2.668625 | -0.989312 |
| 6  | -1.255865 | 4.660880 | -0.980837 |
| 1  | 2.150403  | 5.141500 | -1.387316 |
| 6  | 1.253818  | 4.774619 | 0.550164  |
| 6  | 0.000000  | 5.341169 | -1.547331 |
| 1  | 0.000000  | 4.149437 | 2.200124  |
| 6  | -1.253818 | 4.774619 | 0.550164  |
| 1  | -2.150403 | 5.141500 | -1.387316 |
| 1  | 1.269022  | 5.828766 | 0.847156  |
| 1  | 2.153173  | 4.304750 | 0.961919  |
| 1  | 0.000000  | 5.277860 | -2.641223 |
| 1  | 0.000000  | 6.403737 | -1.282372 |
| 1  | -2.153173 | 4.304750 | 0.961919  |
| 1  | -1.269022 | 5.828766 | 0.847156  |
| 6  | 0.000000  | 0.000000 | 4.559293  |
| 6  | 0.000000  | 0.000000 | 5.758254  |
| 1  | 0.000000  | 0.000000 | 6.821166  |
| 17 | 0.000000  | 0.000000 | 2.911830  |

## IAd2-BrCCH

|   |           |           |           |
|---|-----------|-----------|-----------|
| 7 | -0.000000 | 1.065509  | -1.447669 |
| 6 | 0.000000  | -0.000000 | -0.593164 |
| 7 | -0.000000 | -1.065509 | -1.447669 |
| 6 | 0.000000  | -0.674076 | -2.777643 |
| 6 | 0.000000  | 0.674076  | -2.777643 |
| 1 | -0.000000 | 1.365751  | -3.602383 |
| 1 | -0.000000 | -1.365751 | -3.602383 |
| 6 | 0.000000  | -2.489275 | -1.060437 |
| 6 | 0.000000  | -2.630340 | 0.463119  |
| 6 | 1.256268  | -3.176857 | -1.625625 |
| 6 | -1.256268 | -3.176857 | -1.625625 |
| 1 | 0.878713  | -2.125890 | 0.872512  |
| 1 | -0.878713 | -2.125890 | 0.872512  |
| 6 | 0.000000  | -4.115518 | 0.852614  |
| 1 | 2.142854  | -2.672492 | -1.227185 |
| 1 | 1.281662  | -3.075233 | -2.715748 |
| 6 | 1.255864  | -4.664517 | -1.243031 |
| 1 | -2.142854 | -2.672492 | -1.227185 |
| 1 | -1.281662 | -3.075233 | -2.715748 |
| 6 | -1.255864 | -4.664517 | -1.243031 |
| 1 | 0.000000  | -4.189939 | 1.943603  |
| 6 | 1.253827  | -4.796915 | 0.286447  |
| 6 | -1.253827 | -4.796915 | 0.286447  |
| 1 | 2.150404  | -5.140012 | -1.655415 |
| 6 | 0.000000  | -5.337742 | -1.817879 |
| 1 | -2.150404 | -5.140012 | -1.655415 |
| 1 | 1.268717  | -5.854534 | 0.570675  |
| 1 | 2.153201  | -4.332366 | 0.704101  |
| 1 | -2.153201 | -4.332366 | 0.704101  |

|    |           |           |           |
|----|-----------|-----------|-----------|
| 1  | -1.268717 | -5.854534 | 0.570675  |
| 1  | 0.000000  | -5.261109 | -2.910924 |
| 1  | 0.000000  | -6.403431 | -1.565899 |
| 6  | 0.000000  | 2.489275  | -1.060437 |
| 6  | 1.256268  | 3.176857  | -1.625625 |
| 6  | 0.000000  | 2.630340  | 0.463119  |
| 6  | -1.256268 | 3.176857  | -1.625625 |
| 1  | 2.142854  | 2.672492  | -1.227185 |
| 1  | 1.281662  | 3.075233  | -2.715748 |
| 6  | 1.255864  | 4.664517  | -1.243031 |
| 1  | 0.878713  | 2.125890  | 0.872512  |
| 1  | -0.878713 | 2.125890  | 0.872512  |
| 6  | 0.000000  | 4.115518  | 0.852614  |
| 1  | -1.281662 | 3.075233  | -2.715748 |
| 1  | -2.142854 | 2.672492  | -1.227185 |
| 6  | -1.255864 | 4.664517  | -1.243031 |
| 1  | 2.150404  | 5.140012  | -1.655415 |
| 6  | 1.253827  | 4.796915  | 0.286447  |
| 6  | 0.000000  | 5.337742  | -1.817879 |
| 1  | 0.000000  | 4.189939  | 1.943603  |
| 6  | -1.253827 | 4.796915  | 0.286447  |
| 1  | -2.150404 | 5.140012  | -1.655415 |
| 1  | 1.268717  | 5.854534  | 0.570675  |
| 1  | 2.153201  | 4.332366  | 0.704101  |
| 1  | 0.000000  | 5.261109  | -2.910924 |
| 1  | 0.000000  | 6.403431  | -1.565899 |
| 1  | -2.153201 | 4.332366  | 0.704101  |
| 1  | -1.268717 | 5.854534  | 0.570675  |
| 6  | -0.000000 | 0.000000  | 4.532838  |
| 6  | -0.000000 | 0.000000  | 5.733416  |
| 1  | -0.000000 | 0.000000  | 6.796922  |
| 35 | -0.000000 | 0.000000  | 2.730374  |

## IAd2-ICCH

|   |           |           |           |
|---|-----------|-----------|-----------|
| 7 | 0.000000  | 1.066599  | -1.637145 |
| 6 | 0.000000  | 0.000000  | -0.781247 |
| 7 | -0.000000 | -1.066599 | -1.637145 |
| 6 | -0.000000 | -0.673398 | -2.966054 |
| 6 | 0.000000  | 0.673398  | -2.966054 |
| 1 | 0.000000  | 1.364416  | -3.790970 |
| 1 | -0.000000 | -1.364416 | -3.790970 |
| 6 | -0.000000 | -2.497930 | -1.271830 |
| 6 | -0.000000 | -2.669563 | 0.246941  |
| 6 | 1.256795  | -3.174766 | -1.849503 |
| 6 | -1.256795 | -3.174766 | -1.849503 |
| 1 | 0.880298  | -2.176009 | 0.666029  |
| 1 | -0.880298 | -2.176009 | 0.666029  |
| 6 | -0.000000 | -4.161523 | 0.609418  |
| 1 | 2.143275  | -2.678453 | -1.440827 |
| 1 | 1.283767  | -3.053248 | -2.937340 |
| 6 | 1.255885  | -4.669454 | -1.495866 |
| 1 | -2.143275 | -2.678453 | -1.440827 |
| 1 | -1.283767 | -3.053248 | -2.937340 |
| 6 | -1.255885 | -4.669454 | -1.495866 |

|    |           |           |           |
|----|-----------|-----------|-----------|
| 1  | -0.000000 | -4.254645 | 1.698909  |
| 6  | 1.253917  | -4.831784 | 0.030671  |
| 6  | -1.253917 | -4.831784 | 0.030671  |
| 1  | 2.150404  | -5.136600 | -1.917611 |
| 6  | -0.000000 | -5.331069 | -2.083960 |
| 1  | -2.150404 | -5.136600 | -1.917611 |
| 1  | 1.268447  | -5.894601 | 0.294473  |
| 1  | 2.153237  | -4.375707 | 0.457614  |
| 1  | -2.153237 | -4.375707 | 0.457614  |
| 1  | -1.268447 | -5.894601 | 0.294473  |
| 1  | -0.000000 | -5.232910 | -3.175289 |
| 1  | -0.000000 | -6.401472 | -1.853086 |
| 6  | 0.000000  | 2.497930  | -1.271830 |
| 6  | 1.256795  | 3.174766  | -1.849503 |
| 6  | 0.000000  | 2.669563  | 0.246941  |
| 6  | -1.256795 | 3.174766  | -1.849503 |
| 1  | 2.143275  | 2.678453  | -1.440827 |
| 1  | 1.283767  | 3.053248  | -2.937340 |
| 6  | 1.255885  | 4.669454  | -1.495866 |
| 1  | 0.880298  | 2.176009  | 0.666029  |
| 1  | -0.880298 | 2.176009  | 0.666029  |
| 6  | 0.000000  | 4.161523  | 0.609418  |
| 1  | -1.283767 | 3.053248  | -2.937340 |
| 1  | -2.143275 | 2.678453  | -1.440827 |
| 6  | -1.255885 | 4.669454  | -1.495866 |
| 1  | 2.150404  | 5.136600  | -1.917611 |
| 6  | 1.253917  | 4.831784  | 0.030671  |
| 6  | 0.000000  | 5.331069  | -2.083960 |
| 1  | 0.000000  | 4.254645  | 1.698909  |
| 6  | -1.253917 | 4.831784  | 0.030671  |
| 1  | -2.150404 | 5.136600  | -1.917611 |
| 1  | 1.268447  | 5.894601  | 0.294473  |
| 1  | 2.153237  | 4.375707  | 0.457614  |
| 1  | 0.000000  | 5.232910  | -3.175289 |
| 1  | 0.000000  | 6.401472  | -1.853086 |
| 1  | -2.153237 | 4.375707  | 0.457614  |
| 1  | -1.268447 | 5.894601  | 0.294473  |
| 6  | -0.000000 | -0.000000 | 4.594785  |
| 6  | -0.000000 | -0.000000 | 5.798155  |
| 1  | -0.000000 | -0.000000 | 6.862263  |
| 53 | -0.000000 | -0.000000 | 2.590146  |
